# Supplementary material
Source: ML conference proceedings conference paper supplement (https://proceedings.mlr.press/v139/zhou21b.html)
Supplement: Supplementary file 1 [file zhou21b-supp.zip]

Archive with 124 entries (102 files):
- acnml_camera_ready_supplementary/
- acnml_camera_ready_supplementary/acnml_camera_ready_appendix.pdf
- acnml_camera_ready_supplementary/acnml_camera_ready_combined.pdf
- acnml_camera_ready_supplementary/acnml_icml_code/
- acnml_camera_ready_supplementary/acnml_icml_code/camvid.py
- acnml_camera_ready_supplementary/acnml_icml_code/custom_tensor_dataset.py
- acnml_camera_ready_supplementary/acnml_icml_code/data.py
- acnml_camera_ready_supplementary/acnml_icml_code/experiments/
- acnml_camera_ready_supplementary/acnml_icml_code/experiments/acnml_experiments/
- acnml_camera_ready_supplementary/acnml_icml_code/experiments/acnml_experiments/eval_kfac_nml.py
- acnml_camera_ready_supplementary/acnml_icml_code/experiments/acnml_experiments/eval_nml.py
- acnml_camera_ready_supplementary/acnml_icml_code/experiments/acnml_experiments/record_stats.py
- acnml_camera_ready_supplementary/acnml_icml_code/experiments/acnml_experiments/__pycache__/
- acnml_camera_ready_supplementary/acnml_icml_code/experiments/acnml_experiments/__pycache__/basic_analyze.cpython-37.pyc
- acnml_camera_ready_supplementary/acnml_icml_code/experiments/acnml_experiments/__pycache__/record_stats.cpython-37.pyc
- acnml_camera_ready_supplementary/acnml_icml_code/experiments/ensembling/
- acnml_camera_ready_supplementary/acnml_icml_code/experiments/ensembling/bma_rank.ipynb
- acnml_camera_ready_supplementary/acnml_icml_code/experiments/ensembling/bma_samples_and_scaling.ipynb
- acnml_camera_ready_supplementary/acnml_icml_code/experiments/ensembling/bn_updates_fraction.py
- acnml_camera_ready_supplementary/acnml_icml_code/experiments/ensembling/ensembling.py
- acnml_camera_ready_supplementary/acnml_icml_code/experiments/ensembling/swa_ecdf_ensembles.py
- acnml_camera_ready_supplementary/acnml_icml_code/experiments/grad_cov/
- acnml_camera_ready_supplementary/acnml_icml_code/experiments/grad_cov/grad_cov_utils.py
- acnml_camera_ready_supplementary/acnml_icml_code/experiments/grad_cov/run_grad_cov.py
- acnml_camera_ready_supplementary/acnml_icml_code/experiments/hessian_eigs/
- acnml_camera_ready_supplementary/acnml_icml_code/experiments/hessian_eigs/hess_vec_prod.py
- acnml_camera_ready_supplementary/acnml_icml_code/experiments/hessian_eigs/run_hess_eigs.py
- acnml_camera_ready_supplementary/acnml_icml_code/experiments/imagenet/
- acnml_camera_ready_supplementary/acnml_icml_code/experiments/imagenet/data.py
- acnml_camera_ready_supplementary/acnml_icml_code/experiments/imagenet/eval_net_imagenet.py
- acnml_camera_ready_supplementary/acnml_icml_code/experiments/imagenet/eval_swag_imagenet.py
- acnml_camera_ready_supplementary/acnml_icml_code/experiments/imagenet/run_swag_imagenet.py
- acnml_camera_ready_supplementary/acnml_icml_code/experiments/imagenet/test_swag_gpu.py
- acnml_camera_ready_supplementary/acnml_icml_code/experiments/segmentation/
- acnml_camera_ready_supplementary/acnml_icml_code/experiments/segmentation/evaluate.py
- acnml_camera_ready_supplementary/acnml_icml_code/experiments/segmentation/eval_ensemble.py
- acnml_camera_ready_supplementary/acnml_icml_code/experiments/segmentation/model_results.ipynb
- acnml_camera_ready_supplementary/acnml_icml_code/experiments/segmentation/README.md
- acnml_camera_ready_supplementary/acnml_icml_code/experiments/segmentation/secondary_calibration_checks.ipynb
- acnml_camera_ready_supplementary/acnml_icml_code/experiments/segmentation/train.py
- acnml_camera_ready_supplementary/acnml_icml_code/experiments/segmentation/utils/
- acnml_camera_ready_supplementary/acnml_icml_code/experiments/segmentation/utils/imgs.py
- acnml_camera_ready_supplementary/acnml_icml_code/experiments/segmentation/utils/training.py
- acnml_camera_ready_supplementary/acnml_icml_code/experiments/segmentation/utils/__init__.py
- acnml_camera_ready_supplementary/acnml_icml_code/experiments/train/
- acnml_camera_ready_supplementary/acnml_icml_code/experiments/train/README.md
- acnml_camera_ready_supplementary/acnml_icml_code/experiments/train/run_swag.py
- acnml_camera_ready_supplementary/acnml_icml_code/experiments/train/train.py
- acnml_camera_ready_supplementary/acnml_icml_code/experiments/train/train_kfac.py
- acnml_camera_ready_supplementary/acnml_icml_code/experiments/uncertainty/
- acnml_camera_ready_supplementary/acnml_icml_code/experiments/uncertainty/out_of_dist_plots.ipynb
- acnml_camera_ready_supplementary/acnml_icml_code/experiments/uncertainty/README.md
- acnml_camera_ready_supplementary/acnml_icml_code/experiments/uncertainty/save_calibration_curves.py
- acnml_camera_ready_supplementary/acnml_icml_code/experiments/uncertainty/temp_scaling.py
- acnml_camera_ready_supplementary/acnml_icml_code/experiments/uncertainty/uncertainty.py
- acnml_camera_ready_supplementary/acnml_icml_code/experiments/width/
- acnml_camera_ready_supplementary/acnml_icml_code/experiments/width/pca_2d_plane.py
- acnml_camera_ready_supplementary/acnml_icml_code/experiments/width/pca_orth_width.py
- acnml_camera_ready_supplementary/acnml_icml_code/experiments/width/pca_width.py
- acnml_camera_ready_supplementary/acnml_icml_code/experiments/width/swag_2d_plane.py
- acnml_camera_ready_supplementary/acnml_icml_code/experiments/width/swag_width.py
- acnml_camera_ready_supplementary/acnml_icml_code/losses.py
- acnml_camera_ready_supplementary/acnml_icml_code/README.md
- acnml_camera_ready_supplementary/acnml_icml_code/swag/
- acnml_camera_ready_supplementary/acnml_icml_code/swag/camvid.py
- acnml_camera_ready_supplementary/acnml_icml_code/swag/custom_tensor_dataset.py
- acnml_camera_ready_supplementary/acnml_icml_code/swag/data.py
- acnml_camera_ready_supplementary/acnml_icml_code/swag/kfac/
- acnml_camera_ready_supplementary/acnml_icml_code/swag/kfac/ekfac.py
- acnml_camera_ready_supplementary/acnml_icml_code/swag/kfac/kfac.py
- acnml_camera_ready_supplementary/acnml_icml_code/swag/kfac/__init__.py
- acnml_camera_ready_supplementary/acnml_icml_code/swag/kfac/__pycache__/
- acnml_camera_ready_supplementary/acnml_icml_code/swag/kfac/__pycache__/ekfac.cpython-37.pyc
- acnml_camera_ready_supplementary/acnml_icml_code/swag/kfac/__pycache__/kfac.cpython-37.pyc
- acnml_camera_ready_supplementary/acnml_icml_code/swag/kfac/__pycache__/__init__.cpython-37.pyc
- acnml_camera_ready_supplementary/acnml_icml_code/swag/losses.py
- acnml_camera_ready_supplementary/acnml_icml_code/swag/models/
- acnml_camera_ready_supplementary/acnml_icml_code/swag/models/joint_transforms.py
- acnml_camera_ready_supplementary/acnml_icml_code/swag/models/layers.py
- acnml_camera_ready_supplementary/acnml_icml_code/swag/models/lenet5.py
- acnml_camera_ready_supplementary/acnml_icml_code/swag/models/preresnet.py
- acnml_camera_ready_supplementary/acnml_icml_code/swag/models/preresnet_dropout.py
- acnml_camera_ready_supplementary/acnml_icml_code/swag/models/resnet.py
- acnml_camera_ready_supplementary/acnml_icml_code/swag/models/tiramisu.py
- acnml_camera_ready_supplementary/acnml_icml_code/swag/models/vgg.py
- acnml_camera_ready_supplementary/acnml_icml_code/swag/models/vgg_dropout.py
- acnml_camera_ready_supplementary/acnml_icml_code/swag/models/vgg_smooth.py
- acnml_camera_ready_supplementary/acnml_icml_code/swag/models/wide_resnet.py
- acnml_camera_ready_supplementary/acnml_icml_code/swag/models/wide_resnet_dropout.py
- acnml_camera_ready_supplementary/acnml_icml_code/swag/models/__init__.py
- acnml_camera_ready_supplementary/acnml_icml_code/swag/models/__pycache__/
- acnml_camera_ready_supplementary/acnml_icml_code/swag/models/__pycache__/joint_transforms.cpython-37.pyc
- acnml_camera_ready_supplementary/acnml_icml_code/swag/models/__pycache__/layers.cpython-37.pyc
- acnml_camera_ready_supplementary/acnml_icml_code/swag/models/__pycache__/lenet5.cpython-37.pyc
- acnml_camera_ready_supplementary/acnml_icml_code/swag/models/__pycache__/preresnet.cpython-37.pyc
- acnml_camera_ready_supplementary/acnml_icml_code/swag/models/__pycache__/preresnet_dropout.cpython-37.pyc
- acnml_camera_ready_supplementary/acnml_icml_code/swag/models/__pycache__/resnet.cpython-37.pyc
- acnml_camera_ready_supplementary/acnml_icml_code/swag/models/__pycache__/tiramisu.cpython-37.pyc
- acnml_camera_ready_supplementary/acnml_icml_code/swag/models/__pycache__/vgg.cpython-37.pyc
- acnml_camera_ready_supplementary/acnml_icml_code/swag/models/__pycache__/vgg_dropout.cpython-37.pyc
- acnml_camera_ready_supplementary/acnml_icml_code/swag/models/__pycache__/vgg_smooth.cpython-37.pyc
- acnml_camera_ready_supplementary/acnml_icml_code/swag/models/__pycache__/wide_resnet.cpython-37.pyc
- acnml_camera_ready_supplementary/acnml_icml_code/swag/models/__pycache__/wide_resnet_dropout.cpython-37.pyc
- acnml_camera_ready_supplementary/acnml_icml_code/swag/models/__pycache__/__init__.cpython-37.pyc
- acnml_camera_ready_supplementary/acnml_icml_code/swag/posteriors/
- acnml_camera_ready_supplementary/acnml_icml_code/swag/posteriors/diag_laplace.py
- acnml_camera_ready_supplementary/acnml_icml_code/swag/posteriors/laplace.py
- acnml_camera_ready_supplementary/acnml_icml_code/swag/posteriors/swag.py
- acnml_camera_ready_supplementary/acnml_icml_code/swag/posteriors/__init__.py
- acnml_camera_ready_supplementary/acnml_icml_code/swag/posteriors/__pycache__/
- acnml_camera_ready_supplementary/acnml_icml_code/swag/posteriors/__pycache__/laplace.cpython-37.pyc
- acnml_camera_ready_supplementary/acnml_icml_code/swag/posteriors/__pycache__/swag.cpython-37.pyc
- acnml_camera_ready_supplementary/acnml_icml_code/swag/posteriors/__pycache__/__init__.cpython-37.pyc
- acnml_camera_ready_supplementary/acnml_icml_code/swag/utils.py
- acnml_camera_ready_supplementary/acnml_icml_code/swag/__init__.py
- acnml_camera_ready_supplementary/acnml_icml_code/swag/__pycache__/
- acnml_camera_ready_supplementary/acnml_icml_code/swag/__pycache__/camvid.cpython-37.pyc
- acnml_camera_ready_supplementary/acnml_icml_code/swag/__pycache__/custom_tensor_dataset.cpython-37.pyc
- acnml_camera_ready_supplementary/acnml_icml_code/swag/__pycache__/data.cpython-37.pyc
- acnml_camera_ready_supplementary/acnml_icml_code/swag/__pycache__/losses.cpython-37.pyc
- acnml_camera_ready_supplementary/acnml_icml_code/swag/__pycache__/utils.cpython-37.pyc
- acnml_camera_ready_supplementary/acnml_icml_code/swag/__pycache__/__init__.cpython-37.pyc
- acnml_camera_ready_supplementary/acnml_icml_code/utils.py
- acnml_camera_ready_supplementary/acnml_icml_code/__init__.py
