# Supplementary material
Source: ML conference proceedings conference paper supplement (https://proceedings.mlr.press/v139/zhou21b.html)
Supplement: Supplementary file 1 [file zhou21b-supp.zip › acnml_camera_ready_supplementary/acnml_icml_code/custom_tensor_dataset.py]

import torch
import numpy as np
from torch.utils.data import Dataset, TensorDataset
import torchvision.transforms as transforms

class CustomTensorDataset(Dataset):
    """TensorDataset with support of transforms.
    """
    def __init__(self, tensors, transform=None):
        assert all(tensors[0].size(0) == tensor.size(0) for tensor in tensors)
        self.tensors = tensors
        self.transform = transform

    def __getitem__(self, index):
        x = self.tensors[0][index]

        if self.transform:
            x = self.transform(x)

        y = self.tensors[1][index]

        return x, y

    def __len__(self):
        return self.tensors[0].size(0)
