# Supplementary material
Source: ML conference proceedings conference paper supplement (https://proceedings.mlr.press/v139/zhou21b.html)
Supplement: Supplementary file 1 [file zhou21b-supp.zip › acnml_camera_ready_supplementary/acnml_icml_code/experiments/ensembling/bma_rank.ipynb]

# %% [code]
import numpy as np

import matplotlib.pyplot as plt

%matplotlib inline

# %% [code]
def parse(npz_arr):
    return npz_arr["predictions"], npz_arr["targets"]

def nll(outputs, labels):
    labels = labels.astype(int)
    idx = (np.arange(labels.size), labels)
    ps = outputs[idx]
    nll = -np.sum(np.log(ps))
    return nll

def nll_from_arr(npz_arr, name="", print_name=False):
    all_outputs, labels = parse(npz_arr)
    outputs = np.sum(all_outputs, 2)
    if outputs is None:
        nll = None
    else:
        labels = labels.astype(int)
        idx = (np.arange(labels.size), labels)
        ps = outputs[idx]
        nll = -np.sum(np.log(ps))
    if print_name:
        print(name, end=": ")
    if nll is not None:
        print("%.3f"%nll)
    else:
        print("-")
    return nll

# %% [code]
def accuracy(npz_arr, name="", print_name=False):
    outputs, labels = parse(npz_arr)
    
    if outputs is None:
        acc = None
    else:
        pred_probs = np.sum(outputs, 2)
        acc = np.mean(np.argmax(pred_probs, axis=1) == labels)
    if print_name:
        print(name, end=": ")
    if acc is not None:
        print("%.4f"%acc)
    else:
        print("-")
    return acc

# %% [code]
npz_locations = 'rank_experiment/swag/'

# %% [code]
swag_nll = []
swag_acc = []
for epoch in range(163,326):
        npz_arr = np.load(npz_locations+str(epoch)+'.npz')
        swag_nll.append( nll_from_arr(npz_arr) / 10000 )
        swag_acc.append( accuracy(npz_arr))

# %% [code]
swag_nll = np.array(swag_nll)
swag_acc = np.array(swag_acc)

# %% [code]
swa_npz_locations = 'rank_experiment/swa/'
swa_nll = []
swa_acc = []
for epoch in range(163,326):
        npz_arr = np.load(swa_npz_locations+str(epoch)+'.npz')
        swa_nll.append( nll_from_arr(npz_arr) / 10000 )
        swa_acc.append( accuracy(npz_arr) )

# %% [code]
swa_nll = np.array(swa_nll)
swa_acc = np.array(swa_acc)

# %% [code]
ecdf_vals = np.load('rank_experiment/ecdf_ensembles_0121.npz')

# %% [code]
ecdf_preds = ecdf_vals['predictions']
ecdf_targets = ecdf_vals['targets']

# %% [code]
ecdf_vals.keys()

# %% [code]
ecdf_nll = []
ecdf_acc = []
for i in range(ecdf_preds.shape[2]):
    current_predictions = ecdf_preds[:, :, 0:(i+1)].sum(2) / (i+1)
    
    ecdf_nll.append( nll( current_predictions , ecdf_targets) )
    ecdf_acc.append( (np.argmax(current_predictions, 1) == ecdf_targets).mean() )

# %% [code]
ecdf_nll = np.array(ecdf_nll) / ecdf_preds.shape[0]
ecdf_acc = np.array(ecdf_acc)

# %% [code]
plt.plot(range(161, 326), ecdf_nll, label = 'SGD Ensemble')
#plt.plot(range(161, 325), ecdf_vals['sgd_loss'], label='SGD Ind.')
plt.plot(range(163, 326), swa_nll, label='SWA')
plt.plot(range(163, 326), swag_nll, label = 'SWAG - 30 Samples')
plt.axvline(x=161+140, c='black', label='Rank 140')

plt.legend()
plt.grid()
plt.ylim((0.8, 0.92))
plt.xlabel('Epoch')
plt.ylabel('NLL')
plt.savefig('/home/wesley/Documents/Papers/udl_paper_source/icml/plots/pics/prn56_c100_nll_rank.pdf')

# %% [code]
plt.plot(range(161, 326), ecdf_acc, label = 'SGD Ensemble')
#plt.plot(range(161, 325), ecdf_vals['sgd_acc']/100, label='SGD Ind.')
plt.plot(range(163, 326), swag_acc, label = 'SWAG - 30 Samples')
plt.plot(range(163, 326), swa_acc, label='SWA')

plt.axvline(x=161+140, c='black', label='Rank 140')
plt.xlabel('Epoch')
plt.ylabel('Accuracy')
plt.ylim((0.75, 0.77))
plt.grid()
plt.legend()
plt.savefig('/home/wesley/Documents/Papers/udl_paper_source/icml/plots/pics/prn56_c100_acc_rank.pdf')

# %% [code]
np.savez(file='/home/wesley/Documents/Papers/udl_paper_source/icml/plots/data/prn56_rank.npz',
        swag={'acc':swag_acc, 'nll':swag_nll},
        swa={'acc':swa_acc, 'nll':swa_nll},
        ecdf={'acc':ecdf_acc, 'nll': ecdf_nll},
        sgd={'acc':ecdf_vals['sgd_acc'], 'nll':ecdf_vals['sgd_loss']})

# %% [code]
prior_results = np.load('/home/wesley/Documents/Papers/udl_paper_source/icml/plots/data/prn56_rank.npz')

# %% [code]
sgd_iterates = np.load('rank_experiment/sgd_ecdf_ensembles.npz')

# %% [code]
sgd_ecdf_preds = sgd_iterates['predictions']
sgd_ecdf_targets = sgd_iterates['targets']

# %% [code]
sgd_ecdf_nll = []
sgd_ecdf_acc = []
for i in range(sgd_ecdf_preds.shape[2]):
    current_predictions = sgd_ecdf_preds[:, :, 0:(i+1)].sum(2) / (i+1)
    
    sgd_ecdf_nll.append( nll( current_predictions , sgd_ecdf_targets) )
    sgd_ecdf_acc.append( (np.argmax(current_predictions, 1) == sgd_ecdf_targets).mean() )

# %% [code]
plt.plot(range(161, 326), prior_results['ecdf'].tolist()['acc'], label = 'Ensemble of SGD Iterates - SWA')
plt.plot(range(161, 326), sgd_ecdf_acc, label='Ensemble of SGD Iterates - SGD')
plt.plot(range(163, 326), prior_results['swag'].tolist()['acc'], label = 'SWAG - 30 Samples')
plt.plot(range(163, 326), prior_results['swa'].tolist()['acc'], label='SWA')

plt.axvline(x=161+140, c='black', label='Rank 140')
plt.xlabel('Epoch')
plt.ylabel('Accuracy')
plt.ylim((0.75, 0.77))
plt.grid()
plt.legend()

# %% [code]
npz_locations = 'rank_experiment/swag_rank20/'
swag20_nll = []
swag20_acc = []
for epoch in range(163,326):
        npz_arr = np.load(npz_locations+str(epoch)+'.npz')
        swag20_nll.append( nll_from_arr(npz_arr) / 10000 )
        swag20_acc.append( accuracy(npz_arr))

# %% [code]
swag20_nll = np.array(swag20_nll)
swag20_acc = np.array(swag20_acc)

# %% [code]
plt.plot(range(161, 326), prior_results['ecdf'].tolist()['acc'], label = 'Ensemble of SGD Iterates - SWA')
plt.plot(range(161, 326), sgd_ecdf_acc, label='Ensemble of SGD Iterates - SGD')
plt.plot(range(163, 326), prior_results['swag'].tolist()['acc'], label = 'SWAG - 30 Samples')
plt.plot(range(163, 326), swag20_acc, label = 'SWAG (rank 20) - 30 Samples',alpha=0.5)
plt.plot(range(163, 326), prior_results['swa'].tolist()['acc'], label='SWA')

plt.axvline(x=161+140, c='black', label='Rank 140')
plt.xlabel('Epoch')
plt.ylabel('Accuracy')
plt.ylim((0.75, 0.77))
plt.grid()
plt.legend()
plt.savefig('/home/wesley/Documents/Papers/udl_paper_source/icml/plots/pics/prn56_c100_acc_rank.pdf')

# %% [code]
np.savez(file='/home/wesley/Documents/Papers/udl_paper_source/icml/plots/data/prn56_rank_updated.npz',
        swag=prior_results['swag'],
        swa=prior_results['swa'],
        swa_sgd_ecdf=prior_results['ecdf'],
        sgd_swa=prior_results['sgd'],
        swag20={'acc':swag20_acc, 'nll':swag20_nll},
        sgd_sgd_ecdf={'acc':sgd_ecdf_acc, 'nll':sgd_ecdf_nll},
        sgd_sgd={'acc':sgd_iterates['sgd_acc']/100, 'nll':sgd_iterates['sgd_loss']})

# %% [code]
sgd_iterates.keys()

# %% [code]
