# Supplementary material
Source: ML conference proceedings conference paper supplement (https://proceedings.mlr.press/v139/zhou21b.html)
Supplement: Supplementary file 1 [file zhou21b-supp.zip › acnml_camera_ready_supplementary/acnml_icml_code/experiments/hessian_eigs/run_hess_eigs.py]

"""
    script to compute maximum and minimum eigenvalues of the hessian
"""
import argparse
import torch
import torch.nn.functional as F
import numpy as np
import os
import tqdm

from hess_vec_prod import min_max_hessian_eigs
from swag import models, data

parser = argparse.ArgumentParser(description="SGD/SWA training")
parser.add_argument("--file", type=str, default=None, required=True, help="checkpoint")

parser.add_argument(
    "--dataset", type=str, default="CIFAR10", help="dataset name (default: CIFAR10)"
)
parser.add_argument(
    "--data_path",
    type=str,
    default="/scratch/datasets/",
    metavar="PATH",
    help="path to datasets location (default: None)",
)
parser.add_argument(
    "--use_test",
    dest="use_test",
    action="store_true",
    help="use test dataset instead of validation (default: False)",
)
parser.add_argument(
    "--batch_size",
    type=int,
    default=128,
    metavar="N",
    help="input batch size (default: 128)",
)
parser.add_argument("--split_classes", type=int, default=None)
parser.add_argument(
    "--num_workers",
    type=int,
    default=4,
    metavar="N",
    help="number of workers (default: 4)",
)
parser.add_argument(
    "--model",
    type=str,
    default="VGG16",
    metavar="MODEL",
    help="model name (default: VGG16)",
)
parser.add_argument(
    "--save_path",
    type=str,
    default=None,
    required=True,
    help="path to npz results file",
)

parser.add_argument(
    "--seed", type=int, default=1, metavar="S", help="random seed (default: 1)"
)

args = parser.parse_args()

torch.backends.cudnn.benchmark = True
torch.manual_seed(args.seed)
torch.cuda.manual_seed(args.seed)

print("Using model %s" % args.model)
model_cfg = getattr(models, args.model)

print("Loading dataset %s from %s" % (args.dataset, args.data_path))
loaders, num_classes = data.loaders(
    args.dataset,
    args.data_path,
    args.batch_size,
    args.num_workers,
    model_cfg.transform_train,
    model_cfg.transform_test,
    use_validation=False,
    split_classes=args.split_classes,
    shuffle_train=False,
)

model = model_cfg.base(*model_cfg.args, num_classes=num_classes, **model_cfg.kwargs)
model.cuda()

print("Loading model %s" % args.file)
checkpoint = torch.load(args.file)
model.load_state_dict(checkpoint["state_dict"])

criterion = torch.nn.CrossEntropyLoss()

if args.use_test:
    loader = loaders["test"]
else:
    loader = loaders["train"]

max_eval, min_eval, hvps, pos_evals, neg_evals = min_max_hessian_eigs(
    model, loader, criterion, use_cuda=True, verbose=True
)

print("Maximum eigenvalue: ", max_eval)
print("Minimum eigenvalue: ", min_eval)
print("Number of Hessian vector products: ", hvps)

print("Saving all eigenvalues to ", args.save_path)
np.savez(
    args.save_path, pos_evals=pos_evals.cpu().numpy(), neg_evals=neg_evals.cpu().numpy()
)
