# Supplementary material
Source: ML conference proceedings conference paper supplement (https://proceedings.mlr.press/v139/zhou21b.html)
Supplement: Supplementary file 1 [file zhou21b-supp.zip › acnml_camera_ready_supplementary/acnml_icml_code/experiments/imagenet/data.py]

"""
    separate data loader for imagenet
"""

import os
import torch
import torchvision
import torchvision.transforms as transforms

from PIL import ImageFile

ImageFile.LOAD_TRUNCATED_IMAGES = True


def loaders(path, batch_size, num_workers, shuffle_train=True):
    train_dir = os.path.join(path, "train")
    # validation_dir = os.path.join(path, 'validation')
    validation_dir = os.path.join(path, "val")

    # transformations for pretrained models (https://github.com/pytorch/examples/blob/42e5b996718797e45c46a25c55b031e6768f8440/imagenet/main.py#L89-L101)
    normalize = transforms.Normalize(
        mean=[0.485, 0.456, 0.406], std=[0.229, 0.224, 0.225]
    )

    transform_train = transforms.Compose(
        [
            transforms.RandomSizedCrop(224),
            transforms.RandomHorizontalFlip(),
            transforms.ToTensor(),
            normalize,
        ]
    )

    transform_test = transforms.Compose(
        [
            transforms.Resize(256),
            transforms.CenterCrop(224),
            transforms.ToTensor(),
            normalize,
        ]
    )

    train_set = torchvision.datasets.ImageFolder(train_dir, transform=transform_train)
    test_set = torchvision.datasets.ImageFolder(
        validation_dir, transform=transform_test
    )

    num_classes = 1000

    return (
        {
            "train": torch.utils.data.DataLoader(
                train_set,
                batch_size=batch_size,
                shuffle=shuffle_train,
                num_workers=num_workers,
                pin_memory=True,
            ),
            "test": torch.utils.data.DataLoader(
                test_set,
                batch_size=batch_size,
                shuffle=False,
                num_workers=num_workers,
                pin_memory=True,
            ),
        },
        num_classes,
    )
