# Supplementary material
Source: ML conference proceedings conference paper supplement (https://proceedings.mlr.press/v139/zhou21b.html)
Supplement: Supplementary file 1 [file zhou21b-supp.zip › acnml_camera_ready_supplementary/acnml_icml_code/experiments/imagenet/eval_swag_imagenet.py]

import argparse
import os
import random
import sys
import time
import tabulate

import numpy as np

import torch
import torch.nn.functional as F
import torchvision.models

import data
from swag import utils, losses
from swag.posteriors import SWAG

parser = argparse.ArgumentParser(description="SGD/SWA training")

parser.add_argument(
    "--data_path",
    type=str,
    default=None,
    required=True,
    metavar="PATH",
    help="path to datasets location (default: None)",
)
parser.add_argument(
    "--batch_size",
    type=int,
    default=256,
    metavar="N",
    help="input batch size (default: 256)",
)
parser.add_argument(
    "--num_workers",
    type=int,
    default=4,
    metavar="N",
    help="number of workers (default: 4)",
)
parser.add_argument(
    "--model",
    type=str,
    default=None,
    required=True,
    metavar="MODEL",
    help="model name (default: None)",
)

parser.add_argument(
    "--ckpt",
    type=str,
    required=True,
    default=None,
    metavar="CKPT",
    help="checkpoint to load (default: None)",
)

parser.add_argument(
    "--num_samples",
    type=int,
    default=30,
    metavar="N",
    help="number of samples for SWAG (default: 30)",
)

parser.add_argument("--scale", type=float, default=1.0, help="SWAG scale")
parser.add_argument("--cov_mat", action="store_true", help="save sample covariance")
parser.add_argument(
    "--use_diag_bma", action="store_true", help="sample only diag variacne for BMA"
)

parser.add_argument(
    "--seed", type=int, default=1, metavar="S", help="random seed (default: 1)"
)

parser.add_argument(
    "--save_path_swa",
    type=str,
    default=None,
    required=True,
    help="path to SWA npz results file",
)
parser.add_argument(
    "--save_path_swag",
    type=str,
    default=None,
    required=True,
    help="path to SWAG npz results file",
)

args = parser.parse_args()

eps = 1e-12

args.device = None
if torch.cuda.is_available():
    args.device = torch.device("cuda")
else:
    args.device = torch.device("cpu")

torch.backends.cudnn.deterministic = True
torch.backends.cudnn.benchmark = True
random.seed(args.seed)
torch.manual_seed(args.seed)
torch.cuda.manual_seed(args.seed)

print("Using model %s" % args.model)
model_class = getattr(torchvision.models, args.model)

print("Loading ImageNet from %s" % (args.data_path))
loaders, num_classes = data.loaders(args.data_path, args.batch_size, args.num_workers)

print("Preparing model")
swag_model = SWAG(
    model_class,
    no_cov_mat=not args.cov_mat,
    loading=True,
    max_num_models=20,
    num_classes=num_classes,
)
swag_model.to(args.device)

criterion = losses.cross_entropy

print("Loading checkpoint %s" % args.ckpt)
checkpoint = torch.load(args.ckpt)
swag_model.load_state_dict(checkpoint["state_dict"])

print("SWA")
swag_model.sample(0.0)
print("SWA BN update")
utils.bn_update(loaders["train"], swag_model, verbose=True, subset=0.1)
print("SWA EVAL")
swa_res = utils.predict(loaders["test"], swag_model, verbose=True)

targets = swa_res["targets"]
swa_predictions = swa_res["predictions"]

swa_accuracy = np.mean(np.argmax(swa_predictions, axis=1) == targets)
swa_nll = -np.mean(
    np.log(swa_predictions[np.arange(swa_predictions.shape[0]), targets] + eps)
)
print("SWA. Accuracy: %.2f%% NLL: %.4f" % (swa_accuracy * 100, swa_nll))
swa_entropies = -np.sum(np.log(swa_predictions + eps) * swa_predictions, axis=1)

np.savez(
    args.save_path_swa,
    accuracy=swa_accuracy,
    nll=swa_nll,
    entropies=swa_entropies,
    predictions=swa_predictions,
    targets=targets,
)

print("SWAG")

swag_predictions = np.zeros((len(loaders["test"].dataset), num_classes))

for i in range(args.num_samples):
    swag_model.sample(args.scale, cov=args.cov_mat and (not args.use_diag_bma))

    print("SWAG Sample %d/%d. BN update" % (i + 1, args.num_samples))
    utils.bn_update(loaders["train"], swag_model, verbose=True, subset=0.1)
    print("SWAG Sample %d/%d. EVAL" % (i + 1, args.num_samples))
    res = utils.predict(loaders["test"], swag_model, verbose=True)
    predictions = res["predictions"]

    accuracy = np.mean(np.argmax(predictions, axis=1) == targets)
    nll = -np.mean(np.log(predictions[np.arange(predictions.shape[0]), targets] + eps))
    print(
        "SWAG Sample %d/%d. Accuracy: %.2f%% NLL: %.4f"
        % (i + 1, args.num_samples, accuracy * 100, nll)
    )

    swag_predictions += predictions

    ens_accuracy = np.mean(np.argmax(swag_predictions, axis=1) == targets)
    ens_nll = -np.mean(
        np.log(
            swag_predictions[np.arange(swag_predictions.shape[0]), targets] / (i + 1)
            + eps
        )
    )
    print(
        "Ensemble %d/%d. Accuracy: %.2f%% NLL: %.4f"
        % (i + 1, args.num_samples, ens_accuracy * 100, ens_nll)
    )

swag_predictions /= args.num_samples

swag_accuracy = np.mean(np.argmax(swag_predictions, axis=1) == targets)
swag_nll = -np.mean(
    np.log(swag_predictions[np.arange(swag_predictions.shape[0]), targets] + eps)
)
swag_entropies = -np.sum(np.log(swag_predictions + eps) * swag_predictions, axis=1)

np.savez(
    args.save_path_swag,
    accuracy=swag_accuracy,
    nll=swag_nll,
    entropies=swag_entropies,
    predictions=swag_predictions,
    targets=targets,
)
