# Supplementary material
Source: ML conference proceedings conference paper supplement (https://proceedings.mlr.press/v139/zhou21b.html)
Supplement: Supplementary file 1 [file zhou21b-supp.zip › acnml_camera_ready_supplementary/acnml_icml_code/experiments/segmentation/README.md]

# One Hundred Layers Tiramisu
PyTorch implementation of [The One Hundred Layers Tiramisu: Fully Convolutional DenseNets for Semantic Segmentation](https://arxiv.org/pdf/1611.09326). Based off of the very nice https://github.com/bfortuner/pytorch_tiramisu .

Tiramisu combines [DensetNet](https://arxiv.org/abs/1608.06993) and [U-Net](https://arxiv.org/abs/1505.04597) for high performance semantic segmentation. In this repository, we attempt to replicate the authors' results on the CamVid dataset.

## Commands

  - train SWAG model

  ```python train.py --data_path [data_path] --model FCDenseNet67 --loss cross_entropy --optimizer SGD --lr_init 1e-2 --batch_size 4 --ft_start 750 --ft_batch_size 1 --epochs 1000 --swa --swa_start=850 --swa_lr=1e-3 --dir [dir] ```

  - train SGD model
  
  ```python train.py --data_path [data_path] --model FCDenseNet67 --loss cross_entropy --optimizer SGD --lr_init 1e-2 --batch_size 4 --ft_start 750 --ft_batch_size 1 --epochs 1000 --dir [dir] ```
  
  - run MC Dropout at test time
  
  ```python eval_ensemble.py --data_path [data_path] --batch_size 4 --method Dropout --loss cross_entropy --N 50 --file [sgd_checkpoint] --save_path [output.npz] ```
  
  - run SWAG at test time
  
  ```python eval_ensemble.py --data_path [data_path] --batch_size 4 --method SWAG --scale=0.5 --loss cross_entropy --N 50 --file [swag_checkpoint] --save_path [output.npz] ```
  
## Dataset

Download

* [CamVid Website](http://mi.eng.cam.ac.uk/research/projects/VideoRec/CamVid/)
* [Download](https://github.com/alexgkendall/SegNet-Tutorial/tree/master/CamVid)

Specs

* Training: 367 frames
* Validation: 101 frames
* TestSet: 233 frames
* Dimensions: 360x480
* Classes: 11 (+1 background)

## Architecture

Tiramisu adopts the UNet design with downsampling, bottleneck, and upsampling paths and skip connections. It replaces convolution and max pooling layers with Dense blocks from the DenseNet architecture. Dense blocks contain residual connections like in ResNet except they concatenate, rather than sum, prior feature maps.

## Our Best Results

**FCDenseNet67**

Note that these results are not in the paper because we haven't quite been able to reproduce the RMSProp or SGD results reported in the Hundred Layer Tiramisu paper. We suspect this to be due to subtle architectural differences. As such, our results here are just a demonstration that SWAG can be applied to other problems.

| Dataset     | Accuracy  | mIOU     | ECE     |
| ----------- |:---------:| --------:| -------:|
| SGD         | 91.06     | 64.59    | 0.09144 |
| SWA         | 90.88     | 63.26    | 0.09179 |
| Dropout     | 90.08     | 62.32    | 0.08925 |
| SWAG        | 91.01     | 63.32    | 0.09144 |      


## Training

**Hyperparameters**

* WeightInitialization = HeUniform
* Optimizer = SGD
* Data Augmentation = Random Crops, Horizontal Flips
* WeightDecay = .0001
* Finetune with full-size images, LR = .0001
* Dropout = 0.2
* BatchNorm "we use current batch stats at training, validation, and test time"

## References and Links

* [bfortuner's repo](https://github.com/bfortuner/pytorch_tiramisu)
* [FastAI Project Thread](http://forums.fast.ai/t/one-hundred-layers-tiramisu/2266)
* [Author's Implementation](https://github.com/SimJeg/FC-DenseNet)
* https://github.com/bamos/densenet.pytorch
* https://github.com/liuzhuang13/DenseNet
