# Supplementary material
Source: ML conference proceedings conference paper supplement (https://proceedings.mlr.press/v139/zhou21b.html)
Supplement: Supplementary file 1 [file zhou21b-supp.zip › acnml_camera_ready_supplementary/acnml_icml_code/experiments/segmentation/secondary_calibration_checks.ipynb]

# %% [code]
import numpy as np
import torch

import matplotlib.pyplot as plt

from sklearn.feature_extraction import image

%matplotlib inline

# %% [code]
dropout = np.load('test_preds/drop_v2/preds.npz')
swag = np.load('test_preds/swag_scale_05_v2/preds.npz')
swag_diag = np.load('test_preds/swag_diag_v2/preds.npz')
swa = np.load('test_preds/sgd/swa_preds.npz')
sgd = np.load('test_preds/sgd/sgd_preds.npz')

# %% [code]
def softmax(x, axis=1):
    return np.exp(x) / np.sum(np.exp(x),axis=axis, keepdims=True)

# %% [code]
def compute_local_accuracy(predictions, labels, patch_size = 4, background_label = 11):
    
    acc_list = []
    for i, (pred, label)in enumerate(zip(predictions, labels)):
        if i % 10 is 0:
            print(i)
        pred_patches = image.extract_patches_2d(pred, (patch_size, patch_size))
        label_patches = image.extract_patches_2d(label, (patch_size, patch_size))
        
        background_patches = label_patches == background_label
        #mean_accuracy = (pred_patches == label_patches & ~background_patches).mean(axis=(1,2))
        mean_accuracy = np.sum((pred_patches == label_patches) & ~ background_patches, axis=(1,2)) / np.sum(~background_patches, axis=(1,2))        
        acc_list.append(mean_accuracy)
    return acc_list
        

# %% [code]
def compute_local_confidence(max_predictions, patch_size = 4):
    conf_list = []
    for pred in max_predictions:
        pred_patches = image.extract_patches_2d(pred, (patch_size, patch_size))
        mean_conf = pred_patches.mean(axis=(1,2))
        conf_list.append(mean_conf)
    return conf_list

# %% [code]
drop_acc = np.array(compute_local_accuracy(np.argmax(dropout['predictions'],1), dropout['targets']))
drop_conf = np.array(compute_local_confidence(np.max(dropout['predictions'],1)))

# %% [code]
swag_acc = np.array(compute_local_accuracy(np.argmax(swag['predictions'],1), swag['targets']))
swag_conf = np.array(compute_local_confidence(np.max(swag['predictions'],1)))

# %% [code]
swag_diag_acc = np.array(compute_local_accuracy(np.argmax(swag_diag['predictions'],1), swag_diag['targets']))
swag_diag_conf = np.array(compute_local_confidence(np.max(swag_diag['predictions'],1)))

# %% [code]
swa_acc = np.array(compute_local_accuracy(np.argmax(swa['preds'],1), swa['targets']))
swa_conf = np.array(compute_local_confidence(np.max(softmax(swa['preds'],1),1)))

# %% [code]
sgd_acc = np.array(compute_local_accuracy(np.argmax(sgd['preds'],1), sgd['targets']))
sgd_conf = np.array(compute_local_confidence(np.max(softmax(sgd['preds'],1),1)))

# %% [code]
unc_thresholds = np.arange(0., 1., 0.05)

def conditional_acc_unc(acc, conf, thresholds = unc_thresholds, acc_threshold = 0.5):
    mean_acc = np.zeros_like(thresholds)
    mean_unc = np.zeros_like(thresholds)
    pa_vpu = np.zeros_like(thresholds)
    for i, u in enumerate(thresholds):
        ac = ((conf > u) & (acc > acc_threshold)).sum()
        ic = ((conf > u) & (acc < acc_threshold)).sum()
        
        iu = ((conf < u) & (acc < acc_threshold)).sum()
        au = ((conf < u) & (acc > acc_threshold)).sum()
        mean_acc[i] = ac / (ac + ic)
        mean_unc[i] = iu / (ic + iu)
        pa_vpu[i] = (ac + iu) / (ac + au + ic + iu)
        
        
    return mean_acc, mean_unc, pa_vpu

# %% [code]
((drop_acc > 0.2) & (drop_conf < 0.5)).sum()

# %% [code]
drop_mean_acc, drop_mean_unc, drop_pa = conditional_acc_unc(drop_acc, drop_conf)
swa_mean_acc, swa_mean_unc, swa_pa = conditional_acc_unc(swa_acc, swa_conf)
sgd_mean_acc, sgd_mean_unc, sgd_pa = conditional_acc_unc(sgd_acc, sgd_conf)
swag_diag_mean_acc, swag_diag_mean_unc, swag_diag_pa = conditional_acc_unc(swag_diag_acc, swag_diag_conf)
swag_mean_acc, swag_mean_unc, swag_pa = conditional_acc_unc(swag_acc, swag_conf)

# %% [code]
plt.plot(1-unc_thresholds, drop_mean_acc, label = 'Dropout')
plt.plot(1-unc_thresholds, swa_mean_acc, label = 'SWA')
plt.plot(1-unc_thresholds, swag_mean_acc, label = 'SWAG')
plt.plot(1-unc_thresholds, swag_diag_mean_acc, label = 'SWAG-Diag')
plt.plot(1-unc_thresholds, sgd_mean_acc, label = 'SGD')
plt.xlabel('Uncertainty (1 - Max Prob)')
plt.ylabel('P(Accurate | Confident)')
plt.grid()
plt.legend()
plt.savefig('/home/wesley/Documents/Papers/udl_paper_source/icml/plots/pics/segmentation_acc_conf.pdf')

# %% [code]
plt.plot(1 - unc_thresholds, drop_mean_unc, label = 'Dropout')
plt.plot(1-unc_thresholds, swa_mean_unc, label = 'SWA')
plt.plot(1-unc_thresholds, swag_mean_unc, label = 'SWAG')
plt.plot(1-unc_thresholds, swag_diag_mean_unc, label = 'SWAG-Diag')
plt.plot(1-unc_thresholds, sgd_mean_unc, label='SGD')
plt.ylabel('P(Uncertain | Inaccurate)')
plt.xlabel('Uncertainty (1 - Max Prob) Threshold')
plt.grid()
plt.legend()
plt.savefig('/home/wesley/Documents/Papers/udl_paper_source/icml/plots/pics/segmentation_unc_inacc.pdf')

# %% [code]
plt.plot(1 - unc_thresholds, drop_pa, label = 'Dropout')
plt.plot(1-unc_thresholds, swa_pa, label = 'SWA')
plt.plot(1-unc_thresholds, swag_pa, label='SWAG')
plt.plot(1-unc_thresholds, swag_diag_pa, label = 'SWAG-Diag')
plt.plot(1-unc_thresholds, sgd_pa, label='SGD')
plt.ylabel('PAvPU')
plt.xlabel('Uncertainty (1 - Max Prob) Threshold')
plt.grid()
plt.legend()
plt.savefig('/home/wesley/Documents/Papers/udl_paper_source/icml/plots/pics/segmentation_pavpu.pdf')

# %% [code]
np.savez('/home/wesley/Documents/Papers/udl_paper_source/icml/plots/data/segmentation/patch_analysis.npz',
        unc_thresholds=unc_thresholds,
        drop={'acc':drop_mean_acc, 'unc':drop_mean_unc, 'pa':drop_pa},
        swa={'acc':swa_mean_acc, 'unc':swa_mean_unc, 'pa':swa_pa},
        swag={'acc':swag_mean_acc, 'unc':swag_mean_unc, 'pa':swag_pa},
        swag_diag_pa={'acc':swag_diag_mean_acc, 'unc':swag_diag_mean_unc, 'pa':swag_diag_pa},
        sgd={'acc':sgd_mean_acc, 'unc':sgd_mean_unc, 'pa':sgd_pa})

# %% [code]
plt.rcParams["figure.figsize"] = (12,8)
plt.subplot(221)
plt.plot(1-unc_thresholds, drop_mean_acc, label = 'Dropout')
plt.plot(1-unc_thresholds, swa_mean_acc, label = 'SWA')
plt.plot(1-unc_thresholds, swag_mean_acc, label = 'SWAG')
plt.plot(1-unc_thresholds, sgd_mean_acc, label = 'SGD')
plt.xlabel('Uncertainty (1 - Max Prob)')
plt.ylabel('Mean Patch Accuracy')

plt.subplot(222)
plt.plot(1 - unc_thresholds, drop_mean_unc, label = 'Dropout')
plt.plot(1-unc_thresholds, swa_mean_unc, label = 'SWA')
plt.plot(1-unc_thresholds, swag_mean_unc, label = 'SWAG')
plt.plot(1-unc_thresholds, sgd_mean_unc, label='SGD')
plt.ylabel('P(Uncertain | Inaccurate)')
plt.xlabel('Uncertainty (1 - Max Prob) Threshold')

plt.subplot(223)
plt.plot(1 - unc_thresholds, drop_pa, label = 'Dropout')
plt.plot(1-unc_thresholds, swa_pa, label = 'SWA')
plt.plot(1-unc_thresholds, swag_pa, label='SWAG')
plt.plot(1-unc_thresholds, sgd_pa, label='SGD')
plt.ylabel('PAvPU')
plt.xlabel('Uncertainty (1 - Max Prob) Threshold')
plt.legend()


# %% [code]
