# Supplementary material
Source: ML conference proceedings conference paper supplement (https://proceedings.mlr.press/v139/zhou21b.html)
Supplement: Supplementary file 1 [file zhou21b-supp.zip › acnml_camera_ready_supplementary/acnml_icml_code/experiments/train/train.py]

import argparse
import os
import sys
import time
import torch
import torch.nn.functional as F
import torchvision

# import models
# import utils
import tabulate

from swag import models, utils, losses


parser = argparse.ArgumentParser(description="SGD/SWA training")
parser.add_argument(
    "--dir",
    type=str,
    default=None,
    required=True,
    help="training directory (default: None)",
)

parser.add_argument(
    "--dataset", type=str, default="CIFAR10", help="dataset name (default: CIFAR10)"
)
parser.add_argument(
    "--data_path",
    type=str,
    default=None,
    required=True,
    metavar="PATH",
    help="path to datasets location (default: None)",
)
parser.add_argument(
    "--batch_size",
    type=int,
    default=128,
    metavar="N",
    help="input batch size (default: 128)",
)
parser.add_argument(
    "--num_workers",
    type=int,
    default=4,
    metavar="N",
    help="number of workers (default: 4)",
)
parser.add_argument(
    "--model",
    type=str,
    default=None,
    required=True,
    metavar="MODEL",
    help="model name (default: None)",
)

parser.add_argument(
    "--resume",
    type=str,
    default=None,
    metavar="CKPT",
    help="checkpoint to resume training from (default: None)",
)

parser.add_argument(
    "--epochs",
    type=int,
    default=200,
    metavar="N",
    help="number of epochs to train (default: 200)",
)
parser.add_argument(
    "--save_freq",
    type=int,
    default=25,
    metavar="N",
    help="save frequency (default: 25)",
)
parser.add_argument(
    "--eval_freq",
    type=int,
    default=5,
    metavar="N",
    help="evaluation frequency (default: 5)",
)
parser.add_argument(
    "--lr_init",
    type=float,
    default=0.1,
    metavar="LR",
    help="initial learning rate (default: 0.01)",
)
parser.add_argument(
    "--momentum",
    type=float,
    default=0.9,
    metavar="M",
    help="SGD momentum (default: 0.9)",
)
parser.add_argument(
    "--wd", type=float, default=1e-4, help="weight decay (default: 1e-4)"
)

parser.add_argument("--swa", action="store_true", help="swa usage flag (default: off)")
parser.add_argument(
    "--swa_start",
    type=float,
    default=161,
    metavar="N",
    help="SWA start epoch number (default: 161)",
)
parser.add_argument(
    "--swa_lr", type=float, default=0.05, metavar="LR", help="SWA LR (default: 0.05)"
)
parser.add_argument(
    "--swa_c_epochs",
    type=int,
    default=1,
    metavar="N",
    help="SWA model collection frequency/cycle length in epochs (default: 1)",
)

parser.add_argument(
    "--seed", type=int, default=1, metavar="S", help="random seed (default: 1)"
)

args = parser.parse_args()

print("Preparing directory %s" % args.dir)
os.makedirs(args.dir, exist_ok=True)
with open(os.path.join(args.dir, "command.sh"), "w") as f:
    f.write(" ".join(sys.argv))
    f.write("\n")

torch.backends.cudnn.benchmark = True
torch.manual_seed(args.seed)
torch.cuda.manual_seed(args.seed)

print("Using model %s" % args.model)
model_cfg = getattr(models, args.model)

print("Loading dataset %s from %s" % (args.dataset, args.data_path))
ds = getattr(torchvision.datasets, args.dataset)
path = os.path.join(args.data_path, args.dataset.lower())
train_set = ds(path, train=True, download=True, transform=model_cfg.transform_train)
test_set = ds(path, train=False, download=True, transform=model_cfg.transform_test)
loaders = {
    "train": torch.utils.data.DataLoader(
        train_set,
        batch_size=args.batch_size,
        shuffle=True,
        num_workers=args.num_workers,
        pin_memory=True,
    ),
    "test": torch.utils.data.DataLoader(
        test_set,
        batch_size=args.batch_size,
        shuffle=False,
        num_workers=args.num_workers,
        pin_memory=True,
    ),
}
num_classes = max(train_set.train_labels) + 1

print("Preparing model")
model = model_cfg.base(*model_cfg.args, num_classes=num_classes, **model_cfg.kwargs)
model.cuda()


if args.swa:
    print("SWA training")
    swa_model = model_cfg.base(
        *model_cfg.args, num_classes=num_classes, **model_cfg.kwargs
    )
    swa_model.cuda()
    swa_n = 0
else:
    print("SGD training")


def schedule(epoch):
    t = (epoch) / (args.swa_start if args.swa else args.epochs)
    lr_ratio = args.swa_lr / args.lr_init if args.swa else 0.01
    if t <= 0.5:
        factor = 1.0
    elif t <= 0.9:
        factor = 1.0 - (1.0 - lr_ratio) * (t - 0.5) / 0.4
    else:
        factor = lr_ratio
    return args.lr_init * factor


criterion = losses.cross_entropy

optimizer = torch.optim.SGD(
    model.parameters(), lr=args.lr_init, momentum=args.momentum, weight_decay=args.wd
)

start_epoch = 0
if args.resume is not None:
    print("Resume training from %s" % args.resume)
    checkpoint = torch.load(args.resume)
    start_epoch = checkpoint["epoch"]
    model.load_state_dict(checkpoint["state_dict"])
    optimizer.load_state_dict(checkpoint["optimizer"])
    if args.swa:
        swa_state_dict = checkpoint["swa_state_dict"]
        if swa_state_dict is not None:
            swa_model.load_state_dict(swa_state_dict)
        swa_n_ckpt = checkpoint["swa_n"]
        if swa_n_ckpt is not None:
            swa_n = swa_n_ckpt

columns = ["ep", "lr", "tr_loss", "tr_acc", "te_loss", "te_acc", "time"]
if args.swa:
    columns = columns[:-1] + ["swa_te_loss", "swa_te_acc"] + columns[-1:]
    swa_res = {"loss": None, "accuracy": None}

utils.save_checkpoint(
    args.dir,
    start_epoch,
    state_dict=model.state_dict(),
    swa_state_dict=swa_model.state_dict() if args.swa else None,
    swa_n=swa_n if args.swa else None,
    optimizer=optimizer.state_dict(),
)

for epoch in range(start_epoch, args.epochs):
    time_ep = time.time()

    lr = schedule(epoch)
    utils.adjust_learning_rate(optimizer, lr)
    train_res = utils.train_epoch(loaders["train"], model, criterion, optimizer)
    if (
        epoch == 0
        or epoch % args.eval_freq == args.eval_freq - 1
        or epoch == args.epochs - 1
    ):
        test_res = utils.eval(loaders["test"], model, criterion)
    else:
        test_res = {"loss": None, "accuracy": None}

    if (
        args.swa
        and (epoch + 1) >= args.swa_start
        and (epoch + 1 - args.swa_start) % args.swa_c_epochs == 0
    ):
        utils.moving_average(swa_model, model, 1.0 / (swa_n + 1))
        swa_n += 1
        if (
            epoch == 0
            or epoch % args.eval_freq == args.eval_freq - 1
            or epoch == args.epochs - 1
        ):
            utils.bn_update(loaders["train"], swa_model)
            swa_res = utils.eval(loaders["test"], swa_model, criterion)
        else:
            swa_res = {"loss": None, "accuracy": None}

    if (epoch + 1) % args.save_freq == 0:
        utils.save_checkpoint(
            args.dir,
            epoch + 1,
            state_dict=model.state_dict(),
            swa_state_dict=swa_model.state_dict() if args.swa else None,
            swa_n=swa_n if args.swa else None,
            optimizer=optimizer.state_dict(),
        )

    time_ep = time.time() - time_ep
    values = [
        epoch + 1,
        lr,
        train_res["loss"],
        train_res["accuracy"],
        test_res["loss"],
        test_res["accuracy"],
        time_ep,
    ]
    if args.swa:
        values = values[:-1] + [swa_res["loss"], swa_res["accuracy"]] + values[-1:]
    table = tabulate.tabulate([values], columns, tablefmt="simple", floatfmt="8.4f")
    if epoch % 40 == 0:
        table = table.split("\n")
        table = "\n".join([table[1]] + table)
    else:
        table = table.split("\n")[2]
    print(table)

if args.epochs % args.save_freq != 0:
    utils.save_checkpoint(
        args.dir,
        args.epochs,
        state_dict=model.state_dict(),
        swa_state_dict=swa_model.state_dict() if args.swa else None,
        swa_n=swa_n if args.swa else None,
        optimizer=optimizer.state_dict(),
    )
