# Supplementary material
Source: ML conference proceedings conference paper supplement (https://proceedings.mlr.press/v139/zhou21b.html)
Supplement: Supplementary file 1 [file zhou21b-supp.zip › acnml_camera_ready_supplementary/acnml_icml_code/experiments/uncertainty/out_of_dist_plots.ipynb]

# %% [code]
import numpy as np
import matplotlib.pyplot as plt

# %% [code]
from scipy.stats import entropy

# %% [code]
from temp_scaling import optimal_temp_scale, rescale_temp


# %% [code]
def plot_entropy(myax, inclass, outclass, label, bins = np.logspace(-8, 0.5, num=30), show_legend = False, show_xlabel=False, show_ylabel=False):
    myax.set_title(str(label), fontsize=12)
    myax.set_xscale('log')
    #bins = 10 ** np.linspace(-8, 0.5, 30)
    myax.hist(inclass, bins=bins, color='red', label='In Class')
    myax.hist(outclass, bins=bins, color='black', alpha=0.3, label = 'Out of Class')
    myax.set_ylim((0, 1000))
    if show_xlabel:
        myax.set_xlabel('Entropy')
    if show_ylabel:
        myax.set_ylabel('Count')
    if show_legend:
        myax.legend()

# %% [code]
swag_inclass = np.load('CIFAR5/unc_1_swag.npz')
swag_outclass = np.load('CIFAR5/unc_0_swag.npz')

swagdiag_inclass = np.load('CIFAR5/unc_1_swagdiag.npz')
swagdiag_outclass = np.load('CIFAR5/unc_0_swagdiag.npz')

drop_inclass = np.load('CIFAR5/unc_1_drop.npz')
drop_outclass = np.load('CIFAR5/unc_0_drop.npz')

sgd_inclass = np.load('CIFAR5/unc_1_sgd.npz')
sgd_outclass = np.load('CIFAR5/unc_0_sgd.npz')

swa_inclass = np.load('CIFAR5/unc_1_swa.npz')
swa_outclass = np.load('CIFAR5/unc_0_swa.npz')

swagdrop_inclass = np.load('CIFAR5/unc_1_swagdrop.npz')
swagdrop_outclass = np.load('CIFAR5/unc_0_swagdrop.npz')

# %% [code]
sgd_val = np.load('CIFAR5/unc_sgd_val.npz')
ts_inclass = np.load('CIFAR5/unc_sgd.npz')
ts_outclass = np.load('CIFAR5/unc_0_ts.npz')

# %% [code]
T_sgd, rescaled_sgd = optimal_temp_scale(sgd_val["predictions"], sgd_val["targets"], max_iter=50, lr=1e-3)


# %% [code]
ts_inclass_predictions = rescale_temp(ts_inclass['predictions'], T_sgd)
ts_outclass_predictions = rescale_temp(ts_outclass['predictions'], T_sgd)

# %% [code]
eps = 1e-12
ts_inclass_entropies = -np.sum(np.log(ts_inclass_predictions + eps) * ts_inclass_predictions, axis=1)
ts_outclass_entropies = -np.sum(np.log(ts_outclass_predictions + eps) * ts_outclass_predictions, axis=1)

# %% [code]
plt.rcParams["figure.figsize"] = (12,10)
f, axarr = plt.subplots(2,3)
plot_entropy(axarr[0,0], swag_inclass['entropies'], swag_outclass['entropies'], 'SWAG', show_legend=True, show_ylabel=True)
plot_entropy(axarr[0,1], sgd_inclass['entropies'], sgd_outclass['entropies'], 'SGD')
plot_entropy(axarr[0,2], drop_inclass['entropies'], drop_outclass['entropies'], 'Dropout')
plot_entropy(axarr[1,0], swagdiag_inclass['entropies'], swagdiag_outclass['entropies'], 'SWAG-Diag', show_ylabel=True, show_xlabel=True)
plot_entropy(axarr[1,1], swa_inclass['entropies'], swa_outclass['entropies'], 'SWA', show_xlabel=True)
plot_entropy(axarr[1,2], ts_inclass_entropies, ts_outclass_entropies, 'Temperature Scaling', show_xlabel=True)
plt.savefig('/home/wesley/Documents/Papers/udl_paper_source/icml/plots/pics/c55_entropy_hists.pdf')

# %% [code]
np.savez('/home/wesley/Documents/Papers/udl_paper_source/icml/plots/data/c55_entropies.npz',
        swag={'in':swag_inclass['entropies'], 'out':swag_outclass['entropies']},
        swag_diag={'in':swagdiag_inclass['entropies'], 'out': swagdiag_outclass['entropies']},
         drop={'in':drop_inclass['entropies'], 'out': drop_outclass['entropies']},
         sgd={'in':sgd_inclass['entropies'], 'out':sgd_outclass['entropies']},
         swa={'in':swa_inclass['entropies'], 'out':swa_outclass['entropies']},
         ts={'in':ts_inclass_entropies, 'out':ts_outclass_entropies, 'temp':T_sgd}
        )

# %% [code]
def binned_kl_distance(dist1, dist2, smooth=1e-7, bins = np.logspace(-8, 0.5, num=30)):
    dist1_pdf, _ = np.histogram(dist1, bins)
    dist2_pdf, _ = np.histogram(dist2, bins)
    
    dist1_pdf = dist1_pdf + smooth
    dist2_pdf = dist2_pdf + smooth
    
    dist1_pdf_normalized = dist1_pdf / dist1_pdf.sum()
    dist2_pdf_normalized = dist2_pdf / dist2_pdf.sum()
    
    kldist = entropy(dist1_pdf_normalized, dist2_pdf_normalized) + entropy(dist2_pdf_normalized, dist1_pdf_normalized)
    print(kldist)
    return kldist

# %% [code]
binned_kl_distance(swag_inclass['entropies'], swag_outclass['entropies'])
binned_kl_distance(sgd_inclass['entropies'], sgd_outclass['entropies'])
binned_kl_distance(drop_inclass['entropies'], drop_outclass['entropies'])
binned_kl_distance( swagdiag_inclass['entropies'], swagdiag_outclass['entropies'])
binned_kl_distance(swa_inclass['entropies'], swa_outclass['entropies'])
binned_kl_distance(swagdrop_inclass['entropies'], swagdrop_outclass['entropies'])
binned_kl_distance(ts_inclass_entropies, ts_outclass_entropies)

# %% [code]
np.savez(file='entropy_results.npz',
       swag={'inclass': swag_inclass['entropies'], 'outclass': swag_outclass['entropies']},
       sgd={'inclass': sgd_inclass['entropies'], 'outclass': sgd_outclass['entropies']},
       drop={'inclass': drop_inclass['entropies'], 'outclass': drop_outclass['entropies']},
       swagdiag={'inclass': swagdiag_inclass['entropies'], 'outclass': swagdiag_outclass['entropies']},
       swa={'inclass': swa_inclass['entropies'], 'outclass': swa_outclass['entropies']},
       swagdrop={'inclass': swagdrop_inclass['entropies'], 'outclass': swagdrop_outclass['entropies']},
       )

# %% [code]
smooth_range = np.logspace(start=-30, stop=-1,num=100)
smoothed_dists = np.zeros_like(smooth_range)
for i in range(100):
    smoothed_dists[i] = binned_kl_distance(swag_inclass['entropies'], swag_outclass['entropies'], smooth=smooth_range[i])

# %% [code]
smooth_range

# %% [code]
plt.semilogx(smooth_range, smoothed_dists)
plt.xlabel('Smoothing Parameter')
plt.ylabel('JS Distance')

# %% [code]
np.log(np.log(5))

# %% [code]
