# Supplementary material
Source: ML conference proceedings conference paper supplement (https://proceedings.mlr.press/v139/zhou21b.html)
Supplement: Supplementary file 1 [file zhou21b-supp.zip › acnml_camera_ready_supplementary/acnml_icml_code/experiments/width/pca_orth_width.py]

import argparse
import torch
import numpy as np
import sklearn.decomposition
import tabulate
import time

from swag import data, models, utils, losses

parser = argparse.ArgumentParser(description="Width along PCA directions")

parser.add_argument(
    "--dataset", type=str, default="CIFAR10", help="dataset name (default: CIFAR10)"
)
parser.add_argument(
    "--data_path",
    type=str,
    default="/scratch/datasets/",
    metavar="PATH",
    help="path to datasets location (default: None)",
)
parser.add_argument(
    "--use_test",
    dest="use_test",
    action="store_true",
    help="use test dataset instead of validation (default: False)",
)
parser.add_argument(
    "--batch_size",
    type=int,
    default=128,
    metavar="N",
    help="input batch size (default: 128)",
)
parser.add_argument(
    "--num_workers",
    type=int,
    default=4,
    metavar="N",
    help="number of workers (default: 4)",
)
parser.add_argument(
    "--model",
    type=str,
    default="VGG16",
    metavar="MODEL",
    help="model name (default: VGG16)",
)

parser.add_argument("--checkpoint", action="append")
parser.add_argument(
    "--save_path",
    type=str,
    default=None,
    required=True,
    help="path to npz results file",
)

parser.add_argument(
    "--K", type=int, default=7, metavar="K", help="number of random rays (default: 7)"
)
parser.add_argument(
    "--dist",
    type=float,
    default=60.0,
    metavar="D",
    help="dist to travel along a direction (default: 60.0)",
)
parser.add_argument(
    "--N",
    type=int,
    default=31,
    metavar="N",
    help="number of points on a grid (default: 31)",
)


parser.add_argument(
    "--seed", type=int, default=1, metavar="S", help="random seed (default: 1)"
)

args = parser.parse_args()

torch.backends.cudnn.benchmark = True
torch.manual_seed(args.seed)
torch.cuda.manual_seed(args.seed)
np.random.seed(args.seed)

args.device = None
if torch.cuda.is_available():
    args.device = torch.device("cuda")
else:
    args.device = torch.device("cpu")

print("Using model %s" % args.model)
model_cfg = getattr(models, args.model)

print("Loading dataset %s from %s" % (args.dataset, args.data_path))
loaders, num_classes = data.loaders(
    args.dataset,
    args.data_path,
    args.batch_size,
    args.num_workers,
    model_cfg.transform_train,
    model_cfg.transform_test,
    use_validation=not args.use_test,
)

print("Preparing model")
model = model_cfg.base(*model_cfg.args, num_classes=num_classes, **model_cfg.kwargs)
model.to(args.device)

criterion = losses.cross_entropy

W = []
num_checkpoints = len(args.checkpoint)
for path in args.checkpoint:
    print("Loading %s" % path)
    checkpoint = torch.load(path)
    model.load_state_dict(checkpoint["state_dict"])
    W.append(
        np.concatenate([p.detach().cpu().numpy().ravel() for p in model.parameters()])
    )
W = np.array(W)
print("Shape: %d %d" % (W.shape[0], W.shape[1]))

pca = sklearn.decomposition.PCA(n_components=W.shape[0])
pca.fit(W)
print(pca.explained_variance_ratio_ * 100.0)

ts = np.linspace(-args.dist, args.dist, args.N)

train_acc = np.zeros((args.K, args.N))
train_loss = np.zeros((args.K, args.N))
test_acc = np.zeros((args.K, args.N))
test_loss = np.zeros((args.K, args.N))

columns = ["ray", "t", "tr_loss", "tr_acc", "te_loss", "te_acc", "time"]

mean = pca.mean_
for i in range(args.K):
    v = np.random.normal(size=W.shape[1])
    v /= np.linalg.norm(v)
    for j in range(pca.components_.shape[0]):
        g = pca.components_[j, :].copy()
        g /= np.linalg.norm(g)
        v -= g * np.sum(g * v)
        v /= np.linalg.norm(v)

    for j, t in enumerate(ts):
        start_time = time.time()
        w = mean + t * v

        offset = 0
        for param in model.parameters():
            size = np.prod(param.size())
            param.data.copy_(
                param.new_tensor(w[offset : offset + size].reshape(param.size()))
            )
            offset += size

        utils.bn_update(loaders["train"], model)
        train_res = utils.eval(loaders["train"], model, criterion)
        test_res = utils.eval(loaders["test"], model, criterion)

        train_acc[i, j] = train_res["accuracy"]
        train_loss[i, j] = train_res["loss"]
        test_acc[i, j] = test_res["accuracy"]
        test_loss[i, j] = test_res["loss"]

        run_time = time.time() - start_time
        values = [
            i,
            t,
            train_loss[i, j],
            train_acc[i, j],
            test_loss[i, j],
            test_acc[i, j],
            run_time,
        ]
        table = tabulate.tabulate([values], columns, tablefmt="simple", floatfmt="8.4f")
        if j == 0:
            table = table.split("\n")
            table = "\n".join([table[1]] + table)
        else:
            table = table.split("\n")[2]
        print(table)

np.savez(
    args.save_path,
    N=num_checkpoints,
    dim=W.shape[1],
    K=args.K,
    ts=ts,
    explained_variance=pca.explained_variance_,
    explained_variance_ratio=pca.explained_variance_ratio_,
    train_acc=train_acc,
    train_err=100.0 - train_acc,
    train_loss=train_loss,
    test_acc=test_acc,
    test_err=100.0 - test_acc,
    test_loss=test_loss,
)
