# Supplementary material
Source: ML conference proceedings conference paper supplement (https://proceedings.mlr.press/v139/zhou21b.html)
Supplement: Supplementary file 1 [file zhou21b-supp.zip › acnml_camera_ready_supplementary/acnml_icml_code/README.md]

# Amortized Conditional Normalized Likelihood
This repository contains a PyTorch implementation of Amortized Conditional Normalized Maximum LIkelihood (ACNML) based on the SWAG implementation at https://github.com/wjmaddox/swa\_gaussian/. 

To reproduce experiments, first train SWAG following the instructions in experiments/train/, using the script experiments/train/run\_swag.py, and save the final checkpoint. The training procedure has not been changed in ACNML. Commands used to train can be found in paper\_results/modelname/seed\_/command.sh. We also include a copy of the paper\_results folder that includes pretrained models at https://drive.google.com/drive/folders/17\_n0VG2o0uqMBQarfDcIIKVfk4sCXhKu?usp=sharing.

After training SWAG, use experiments/amortized\_cnml\_experiments/eval\_nml.py to compute the ACNML logits for a dataset and save them in a directory. The script can also be used to save the SWA and Bayesian model averaging logits. Saved logits can also already be found in the paper\_results folder. See paper\_results/vgg16/seed1/npy\_files.command.sh for an example command.


The rest of the readme refers to SWAG.

# A Simple Baseline for Bayesian Deep Learning

This repository contains a PyTorch implementation of Stochastic Weight Averaging-Gaussian (SWAG) from the paper

[A Simple Baseline for Bayesian Uncertainty in Deep Learning](https://arxiv.org/abs/1902.02476)

by Wesley Maddox, Timur Garipov, Pavel Izmailov, Dmitry Vetrov, and Andrew Gordon Wilson

## Introduction

SWA-Gaussian (SWAG) is a convenient method for uncertainty representation and calibration in Bayesian deep learning.
The key idea of SWAG is that the SGD iterates, with a modified learning rate schedule, act like samples from a Gaussian distribution; SWAG fits this Gaussian distribution by capturing the [SWA](https://arxiv.org/abs/1803.05407) mean and a covariance matrix, representing the first two moments of SGD iterates. We use this Gaussian distribution as a posterior over neural network weights, and then perform a Bayesian model average, for uncertainty representation and calibration.

<p align="center">
  <img src="https://user-images.githubusercontent.com/14368801/52224039-09ab0b80-2875-11e9-9c12-c72b88abf4a9.png" width=350>
  <img src="https://user-images.githubusercontent.com/14368801/52224049-0dd72900-2875-11e9-9de8-540ceaae60b3.png" width=350>
</p>


In this repo, we implement SWAG for image classification with several different architectures on both CIFAR datasets and ImageNet. We also implement SWAG for semantic segmentation on CamVid using our implementation of a FCDenseNet67.
We additionally include several other experiments on exploring the covariance of the gradients of the SGD iterates, the eigenvalues of the Hessian, and width/PCA decompositions of the SWAG approximate posterior.

CIFAR10 -> STL10             |  CIFAR100
:-------------------------:|:-------------------------:
![](plots/stl_wrn.jpg)  |  ![](plots/c100_resnet110.jpg)

Please cite our work if you find it useful:
```bibtex
@article{maddoxfast,
  title={A Simple Baseline for Bayesian Uncertainty in Deep Learning},
  author={Maddox, Wesley and Garipov, Timur and Izmailov, Pavel and Vetrov, Dmitry and Wilson, Andrew Gordon},
  journal={arXiv preprint arXiv:1902.02476},
  year={2019}
}
```

## Installation:

```bash
python setup.py develop
```

See requirements.txt file for requirements that came from our setup. We use Pytorch 1.0.0 in our experiments.

Unless otherwise described, all experiments were run on a single GPU. Note that if you are using CUDA 10 you may need to manually install Pytorch with the correct CUDA toolkit.

## File Structure

```
.
+-- swag/
|   +-- posteriors/
    |   +-- swag.py (class definition for SWA, SWAG and SWAG-Diag)
    |   +-- laplace.py (class definition for KFAC Laplace)
|   +-- models/ (Folder with all model definitions)
|   +-- utils.py (utility functions)
+-- experiments/
|   +-- train/ (folder containing standard training scripts for non-ImageNet data)
|   +-- imagenet/ (folder containing ImageNet training scripts)
|   +-- grad_cov/ (gradient covariance and optimal learning rate experiments)      

|   +-- hessian_eigs/ (folder for eigenvalues of hessian)

|   +-- segmentation/ (folder containing training scripts for segmentation experiments)
|   +-- uncertainty/ (folder containing scripts and methods for all uncertainty experiments)
|   +-- width/ (folder containing scripts for PCA and SVD of SGD trajectories)
+-- tests/ (folder containing tests for SWAG sampling and SWAG log-likelihood calculation.)
```

### Example Commands

**See experiments/* for particular READMEs**

[Image Classification](experiments/train/README.md)

[Segmentation](experiments/segmentation/README.md)

[Uncertainty](experiments/uncertainty/README.md)

Some other commands are listed here:

*Hessian eigenvalues*

```cd experiments/hessian_eigs; python run_hess_eigs.py --dataset CIFAR100 --data_path [data_path] --model PreResNet110 --use_test --file [ckpt] --save_path [output.npz] ```

*Gradient covariances*

```cd experiments/grad_cov; python run_grad_cov.py --dataset CIFAR100 --data_path [data_path] --model VGG16 --use_test --epochs=300 --lr_init=0.05 --wd=5e-4 --swa --swa_start 161 --swa_lr=0.01 --grad_cov_start 251 --dir [dir] ```

Note that this will output the gradient covariances onto the console, so you ought to write these into a log file and retrieve them afterwards.

## References for Code Base

Stochastic weight averaging: [Pytorch repo](https://github.com/timgaripov/swa/); most of the base methods and model definitions are built off of this repo.

Model implementations:
  - VGG: https://github.com/pytorch/vision/
  - PreResNet: https://github.com/bearpaw/pytorch-classification
  - WideResNet: https://github.com/meliketoy/wide-resnet.pytorch
  - FCDensenet67: https://github.com/bfortuner/pytorch_tiramisu

Hessian eigenvalue computation: [PyTorch repo](https://github.com/tomgoldstein/loss-landscape), but we ultimately ended up using [GPyTorch](https://gpytorch.ai) as it allows calculation of more eigenvalues.

Segmentation evaluation metrics: [Lasagne repo](https://github.com/SimJeg/FC-DenseNet/blob/master/metrics.py)
