# Supplementary material
Source: ML conference proceedings conference paper supplement (https://proceedings.mlr.press/v139/zhou21b.html)
Supplement: Supplementary file 1 [file zhou21b-supp.zip › acnml_camera_ready_supplementary/acnml_icml_code/swag/__init__.py]

#!/usr/bin/env python3

from . import models, posteriors, data, losses, utils

__all__ = [
    # submodules
    "utils",
    "data",
    "losses",
    "models",
    "posteriors",
    # classes
    # functions
]
