# Supplementary material
Source: ML conference proceedings conference paper supplement (https://proceedings.mlr.press/v139/zhou21b.html)
Supplement: Supplementary file 1 [file zhou21b-supp.zip › acnml_camera_ready_supplementary/acnml_icml_code/swag/models/__init__.py]

from .preresnet import *
from .preresnet_dropout import *
from .vgg import *
from .vgg_smooth import *
from .vgg_dropout import *
from .wide_resnet import *
from .wide_resnet_dropout import *
from .lenet5 import *

from .tiramisu import *
