# Supplementary material
Source: ML conference proceedings conference paper supplement (https://proceedings.mlr.press/v139/zhou21b.html)
Supplement: Supplementary file 1 [file zhou21b-supp.zip › acnml_camera_ready_supplementary/acnml_icml_code/swag/models/joint_transforms.py]

"""
    joint transforms for segmentation data
    ported from: #from: https://github.com/bfortuner/pytorch_tiramisu
"""
from __future__ import division
import torch
import math
import random
from PIL import Image, ImageOps
import numpy as np
import numbers
import types

import torchvision.transforms.functional as TF

_pil_interpolation_to_str = {
    Image.NEAREST: "PIL.Image.NEAREST",
    Image.BILINEAR: "PIL.Image.BILINEAR",
    Image.BICUBIC: "PIL.Image.BICUBIC",
    Image.LANCZOS: "PIL.Image.LANCZOS",
}


class JointCompose(object):
    """Composes several transforms together.

    Args:
        transforms (list of ``Transform`` objects): list of transforms to compose.

    Example:
        >>> transforms.Compose([
        >>>     transforms.CenterCrop(10),
        >>>     transforms.ToTensor(),
        >>> ])
    """

    def __init__(self, transforms):
        self.transforms = transforms

    def __call__(self, img, segmentation):
        for t in self.transforms:
            img, segmentation = t(img, segmentation)
        return img, segmentation

    def __repr__(self):
        format_string = self.__class__.__name__ + "("
        for t in self.transforms:
            format_string += "\n"
            format_string += "    {0}".format(t)
        format_string += "\n)"
        return format_string


class JointRandomResizedCrop(object):
    """Crop the given PIL Image to random size and aspect ratio.

    A crop of random size (default: of 0.08 to 1.0) of the original size and a random
    aspect ratio (default: of 3/4 to 4/3) of the original aspect ratio is made. This crop
    is finally resized to given size.
    This is popularly used to train the Inception networks.

    This is copied from pytorch RandomResizedCrop

    Args:
        size: expected output size of each edge
        scale: range of size of the origin size cropped
        ratio: range of aspect ratio of the origin aspect ratio cropped
        interpolation: Default: PIL.Image.BILINEAR
    """

    def __init__(
        self,
        size,
        scale=(0.08, 1.0),
        ratio=(3.0 / 4.0, 4.0 / 3.0),
        interpolation=Image.BILINEAR,
    ):
        self.size = (size, size)
        self.interpolation = interpolation
        self.scale = scale
        self.ratio = ratio

    @staticmethod
    def get_params(img, scale, ratio):
        """Get parameters for ``crop`` for a random sized crop.

        Args:
            img (PIL Image): Image to be cropped.
            scale (tuple): range of size of the origin size cropped
            ratio (tuple): range of aspect ratio of the origin aspect ratio cropped

        Returns:
            tuple: params (i, j, h, w) to be passed to ``crop`` for a random
                sized crop.
        """
        for attempt in range(10):
            area = img.size[0] * img.size[1]
            target_area = random.uniform(*scale) * area
            aspect_ratio = random.uniform(*ratio)

            w = int(round(math.sqrt(target_area * aspect_ratio)))
            h = int(round(math.sqrt(target_area / aspect_ratio)))

            if random.random() < 0.5:
                w, h = h, w

            if w <= img.size[0] and h <= img.size[1]:
                i = random.randint(0, img.size[1] - h)
                j = random.randint(0, img.size[0] - w)
                return i, j, h, w

        # Fallback
        w = min(img.size[0], img.size[1])
        i = (img.size[1] - w) // 2
        j = (img.size[0] - w) // 2
        return i, j, w, w

    def __call__(self, img, segmentation):
        """
        Args:
            img (PIL Image): Image to be cropped and resized.
            segmentation (PIL Image): Image that is a segmentation to be cropped and resized.

        Returns:
            PIL Image: Randomly cropped and resized image.
            PIL Image: Randomly cropped and resized image.
        """
        i, j, h, w = self.get_params(img, self.scale, self.ratio)
        img = TF.resized_crop(img, i, j, h, w, self.size, self.interpolation)
        segmentation = TF.resized_crop(
            segmentation, i, j, h, w, self.size, self.interpolation
        )
        return img, segmentation

    def __repr__(self):
        interpolate_str = _pil_interpolation_to_str[self.interpolation]
        format_string = self.__class__.__name__ + "(size={0}".format(self.size)
        format_string += ", scale={0}".format(tuple(round(s, 4) for s in self.scale))
        format_string += ", ratio={0}".format(tuple(round(r, 4) for r in self.ratio))
        format_string += ", interpolation={0})".format(interpolate_str)
        return format_string


class JointRandomHorizontalFlip(object):
    """Randomly horizontally flips the given list of PIL.Image with a probability of 0.5
    """

    def __call__(self, image, segmentation):
        if random.random() < 0.5:
            image = TF.hflip(image)
            segmentation = TF.hflip(segmentation)
        return image, segmentation


class LabelToLongTensor(object):
    def __call__(self, pic):
        if isinstance(pic, np.ndarray):
            # handle numpy array
            label = torch.from_numpy(pic).long()
        else:
            label = torch.ByteTensor(torch.ByteStorage.from_buffer(pic.tobytes()))
            label = label.view(pic.size[1], pic.size[0], 1)
            label = label.transpose(0, 1).transpose(0, 2).squeeze().contiguous().long()
        return label
