# Supplementary material
Source: ML conference proceedings conference paper supplement (https://proceedings.mlr.press/v139/zhou21b.html)
Supplement: Supplementary file 1 [file zhou21b-supp.zip › acnml_camera_ready_supplementary/acnml_icml_code/swag/models/layers.py]

"""
    layer definitions for 100-layer tiramisu
    #from: https://github.com/bfortuner/pytorch_tiramisu
"""
import torch
import torch.nn as nn


class DenseLayer(nn.Sequential):
    def __init__(self, in_channels, growth_rate):
        super().__init__()
        self.add_module("norm", nn.BatchNorm2d(in_channels))
        self.add_module("relu", nn.ReLU(True))
        self.add_module(
            "conv",
            nn.Conv2d(
                in_channels, growth_rate, kernel_size=3, stride=1, padding=1, bias=True
            ),
        )
        self.add_module("drop", nn.Dropout(p=0.2))

    def forward(self, x):
        return super().forward(x)


class DenseBlock(nn.Module):
    def __init__(self, in_channels, growth_rate, n_layers, upsample=False):
        super().__init__()
        self.upsample = upsample
        self.layers = nn.ModuleList(
            [
                DenseLayer(in_channels + i * growth_rate, growth_rate)
                for i in range(n_layers)
            ]
        )

    def forward(self, x):
        if self.upsample:
            new_features = []
            # we pass all previous activations into each dense layer normally
            # But we only store each dense layer's output in the new_features array
            for layer in self.layers:
                out = layer(x)
                x = torch.cat([x, out], 1)
                new_features.append(out)
            return torch.cat(new_features, 1)
        else:
            for layer in self.layers:
                out = layer(x)
                x = torch.cat([x, out], 1)  # 1 = channel axis
            return x


class TransitionDown(nn.Sequential):
    def __init__(self, in_channels):
        super().__init__()
        self.add_module("norm", nn.BatchNorm2d(num_features=in_channels))
        self.add_module("relu", nn.ReLU(inplace=True))
        self.add_module(
            "conv",
            nn.Conv2d(
                in_channels, in_channels, kernel_size=1, stride=1, padding=0, bias=True
            ),
        )
        self.add_module("drop", nn.Dropout2d(0.2))
        self.add_module("maxpool", nn.MaxPool2d(2))

    def forward(self, x):
        return super().forward(x)


class TransitionUp(nn.Module):
    def __init__(self, in_channels, out_channels):
        super().__init__()
        self.convTrans = nn.ConvTranspose2d(
            in_channels=in_channels,
            out_channels=out_channels,
            kernel_size=3,
            stride=2,
            padding=0,
            bias=True,
        )

    def forward(self, x, skip):
        out = self.convTrans(x)
        out = center_crop(out, skip.size(2), skip.size(3))
        out = torch.cat([out, skip], 1)
        return out


class Bottleneck(nn.Sequential):
    def __init__(self, in_channels, growth_rate, n_layers):
        super().__init__()
        self.add_module(
            "bottleneck", DenseBlock(in_channels, growth_rate, n_layers, upsample=True)
        )

    def forward(self, x):
        return super().forward(x)


def center_crop(layer, max_height, max_width):
    _, _, h, w = layer.size()
    xy1 = (w - max_width) // 2
    xy2 = (h - max_height) // 2
    return layer[:, :, xy2 : (xy2 + max_height), xy1 : (xy1 + max_width)]
