# Supplementary material
Source: ML conference proceedings conference paper supplement (https://proceedings.mlr.press/v139/zhou21b.html)
Supplement: Supplementary file 1 [file zhou21b-supp.zip › acnml_camera_ready_supplementary/acnml_icml_code/swag/models/resnet.py]

"""
Properly implemented ResNet-s for CIFAR10 as described in paper [1].
The implementation and structure of this file is hugely influenced by [2]
which is implemented for ImageNet and doesn't have option A for identity.
Moreover, most of the implementations on the web is copy-paste from
torchvision's resnet and has wrong number of params.
Proper ResNet-s for CIFAR10 (for fair comparision and etc.) has following
number of layers and parameters:
name      | layers | params
ResNet20  |    20  | 0.27M
ResNet32  |    32  | 0.46M
ResNet44  |    44  | 0.66M
ResNet56  |    56  | 0.85M
ResNet110 |   110  |  1.7M
ResNet1202|  1202  | 19.4m
which this implementation indeed has.
Reference:
[1] Kaiming He, Xiangyu Zhang, Shaoqing Ren, Jian Sun
    Deep Residual Learning for Image Recognition. arXiv:1512.03385
[2] https://github.com/pytorch/vision/blob/master/torchvision/models/resnet.py
If you use this implementation in you work, please don't forget to mention the
author, Yerlan Idelbayev.
"""
import os

import torch
import torchvision.transforms as transforms
import torch.nn as nn
import torch.nn.functional as F
import torch.nn.init as init
from urllib.request import urlretrieve

__all__ = ['ResNet', 'ResNet20', 'resnet20', 'resnet32', 'resnet44', 'resnet56', 'resnet110', 'resnet1202',
           'load_pretrained_resnet20_cifar10_model', 'load_pretrained_resnet32_cifar10_model']


def _weights_init(m):
    classname = m.__class__.__name__
    # print(classname)
    if isinstance(m, nn.Linear) or isinstance(m, nn.Conv2d):
        init.kaiming_normal_(m.weight)


class LambdaLayer(nn.Module):
    def __init__(self, lambd):
        super(LambdaLayer, self).__init__()
        self.lambd = lambd

    def forward(self, x):
        return self.lambd(x)


class BasicBlock(nn.Module):
    expansion = 1

    def __init__(self, in_planes, planes, stride=1, option='A'):
        super(BasicBlock, self).__init__()
        self.conv1 = nn.Conv2d(in_planes, planes, kernel_size=3, stride=stride, padding=1, bias=False)
        self.bn1 = nn.BatchNorm2d(planes)
        self.conv2 = nn.Conv2d(planes, planes, kernel_size=3, stride=1, padding=1, bias=False)
        self.bn2 = nn.BatchNorm2d(planes)

        self.shortcut = nn.Sequential()
        if stride != 1 or in_planes != planes:
            if option == 'A':
                """
                For CIFAR10 ResNet paper uses option A.
                """
                self.shortcut = LambdaLayer(lambda x:
                                            F.pad(x[:, :, ::2, ::2], (0, 0, 0, 0, planes // 4, planes // 4), "constant",
                                                  0))
            elif option == 'B':
                self.shortcut = nn.Sequential(
                    nn.Conv2d(in_planes, self.expansion * planes, kernel_size=1, stride=stride, bias=False),
                    nn.BatchNorm2d(self.expansion * planes)
                )

    def forward(self, x):
        out = F.relu(self.bn1(self.conv1(x)))
        out = self.bn2(self.conv2(out))
        out += self.shortcut(x)
        out = F.relu(out)
        return out


class ResNet(nn.Module):
    def __init__(self, block, num_blocks, num_classes=10):
        super(ResNet, self).__init__()
        self.in_planes = 16

        self.conv1 = nn.Conv2d(3, 16, kernel_size=3, stride=1, padding=1, bias=False)
        self.bn1 = nn.BatchNorm2d(16)
        self.layer1 = self._make_layer(block, 16, num_blocks[0], stride=1)
        self.layer2 = self._make_layer(block, 32, num_blocks[1], stride=2)
        self.layer3 = self._make_layer(block, 64, num_blocks[2], stride=2)
        self.linear = nn.Linear(64, num_classes)

        self.apply(_weights_init)

    def _make_layer(self, block, planes, num_blocks, stride):
        strides = [stride] + [1] * (num_blocks - 1)
        layers = []
        for stride in strides:
            layers.append(block(self.in_planes, planes, stride))
            self.in_planes = planes * block.expansion

        return nn.Sequential(*layers)

    def forward(self, x):
        out = F.relu(self.bn1(self.conv1(x)))
        out = self.layer1(out)
        out = self.layer2(out)
        out = self.layer3(out)
        out = F.avg_pool2d(out, out.size()[3])
        out = out.view(out.size(0), -1)
        out = self.linear(out)
        return out

# actual resnet 20
class ResNet20:
    base = ResNet
    args = list()
    kwargs = {"block": BasicBlock, "num_blocks": [3,3,3]}
    transform_train = transforms.Compose(
        [
            transforms.Resize(32),
            transforms.RandomCrop(32, padding=4),
            transforms.RandomHorizontalFlip(),
            transforms.ToTensor(),
            transforms.Normalize((0.4914, 0.4822, 0.4465), (0.2023, 0.1994, 0.2010)),
        ]
    )
    transform_test = transforms.Compose(
        [
            transforms.Resize(32),
            transforms.ToTensor(),
            transforms.Normalize((0.4914, 0.4822, 0.4465), (0.2023, 0.1994, 0.2010)),
        ]
    )

def resnet20():
    return ResNet(BasicBlock, [3, 3, 3])


def resnet32():
    return ResNet(BasicBlock, [5, 5, 5])


def resnet44():
    return ResNet(BasicBlock, [7, 7, 7])


def resnet56():
    return ResNet(BasicBlock, [9, 9, 9])


def resnet110():
    return ResNet(BasicBlock, [18, 18, 18])


def resnet1202():
    return ResNet(BasicBlock, [200, 200, 200])


def test(net):
    import numpy as np
    total_params = 0

    for x in filter(lambda p: p.requires_grad, net.parameters()):
        total_params += np.prod(x.data.numpy().shape)
    print("Total number of params", total_params)
    print("Total layers", len(list(filter(lambda p: p.requires_grad and len(p.data.size()) > 1, net.parameters()))))


def load_pretrained_resnet20_cifar10_model(model):
    # Define pretrained model path
    output_folder = 'models'
    if not os.path.exists(output_folder):
        os.makedirs(output_folder)
    dst_model_path = os.path.join(output_folder, "resnet20_pretrained_cifar10.th")

    # Download pretrained weights if needed
    if not os.path.exists(dst_model_path):
        src_model_path = "https://github.com/akamaster/pytorch_resnet_cifar10/raw/master/pretrained_models/resnet20.th"
        urlretrieve(src_model_path, dst_model_path)

    # Load weights into the model
    model = torch.nn.DataParallel(model)  # The pretrained model is from DataParallel kind to adjust to it
    model.cuda() if torch.cuda.is_available() else model
    checkpoint = torch.load(dst_model_path, map_location=lambda storage, loc: storage)
    model.load_state_dict(checkpoint['state_dict'])
    model = model.module
    return model


def load_pretrained_resnet32_cifar10_model(model):
    # Define pretrained model path
    output_folder = 'models'
    if not os.path.exists(output_folder):
        os.makedirs(output_folder)
    dst_model_path = os.path.join(output_folder, "resnet32_pretrained_cifar10.th")

    # Download pretrained weights if needed
    if not os.path.exists(dst_model_path):
        src_model_path = "https://github.com/akamaster/pytorch_resnet_cifar10/raw/master/pretrained_models/resnet32.th"
        urlretrieve(src_model_path, dst_model_path)

    # Load weights into the model
    model = torch.nn.DataParallel(model)  # The pretrained model is from DataParallel kind to adjust to it
    model.cuda() if torch.cuda.is_available() else model
    checkpoint = torch.load(dst_model_path, map_location=lambda storage, loc: storage)
    model.load_state_dict(checkpoint['state_dict'])
    model = model.module
    return model


if __name__ == "__main__":
    for net_name in __all__:
        if net_name.startswith('resnet'):
            # print(net_name)
            test(globals()[net_name]())
