# Supplementary material
Source: ML conference proceedings conference paper supplement (https://proceedings.mlr.press/v139/zhou21b.html)
Supplement: Supplementary file 1 [file zhou21b-supp.zip › acnml_camera_ready_supplementary/acnml_icml_code/swag/posteriors/__init__.py]

#!/usr/bin/env python3

from .swag import SWAG
from .laplace import KFACLaplace

# from .swag_laplace import
