# Supplementary material
Source: ML conference proceedings conference paper supplement (https://proceedings.mlr.press/v139/zhou21b.html)
Supplement: Supplementary file 1 [file zhou21b-supp.zip › acnml_camera_ready_supplementary/acnml_icml_code/swag/posteriors/swag.py]

"""
    implementation of SWAG
"""

import torch
import numpy as np
import itertools
from torch.distributions.normal import Normal
import copy

import gpytorch
from gpytorch.lazy import RootLazyTensor, DiagLazyTensor, AddedDiagLazyTensor
from gpytorch.distributions import MultivariateNormal

from ..utils import flatten, unflatten_like


def swag_parameters(module, params, no_cov_mat=True):
    for name in list(module._parameters.keys()):
        if module._parameters[name] is None:
            continue
        data = module._parameters[name].data
        # why did we need to pop this
        module._parameters.pop(name)
        module.register_buffer("%s_mean" % name, data.new(data.size()).zero_())
        module.register_buffer("%s_sq_mean" % name, data.new(data.size()).zero_())

        if no_cov_mat is False:
            module.register_buffer(
                "%s_cov_mat_sqrt" % name, data.new_empty((0, data.numel())).zero_()
            )

        params.append((module, name))


class SWAG(torch.nn.Module):
    def __init__(
        self, base, no_cov_mat=True, max_num_models=0, var_clamp=1e-30, *args, **kwargs
    ):
        super(SWAG, self).__init__()

        self.register_buffer("n_models", torch.zeros([1], dtype=torch.long))
        self.params = list()

        self.no_cov_mat = no_cov_mat
        self.max_num_models = max_num_models

        self.var_clamp = var_clamp

        self.base = base(*args, **kwargs)
        self.base.apply(
            lambda module: swag_parameters(
                module=module, params=self.params, no_cov_mat=self.no_cov_mat
            )
        )

    def forward(self, *args, **kwargs):
        return self.base(*args, **kwargs)

    def sample(self, scale=1.0, cov=False, seed=None, block=False, fullrank=True):
        if seed is not None:
            torch.manual_seed(seed)

        if not block:
            self.sample_fullrank(scale, cov, fullrank)
        else:
            self.sample_blockwise(scale, cov, fullrank)


    def sample_blockwise(self, scale, cov, fullrank):
        for module, name in self.params:
            mean = module.__getattr__("%s_mean" % name)

            sq_mean = module.__getattr__("%s_sq_mean" % name)
            eps = torch.randn_like(mean)

            var = torch.clamp(sq_mean - mean ** 2, self.var_clamp)

            scaled_diag_sample = scale * torch.sqrt(var) * eps

            if cov is True:
                cov_mat_sqrt = module.__getattr__("%s_cov_mat_sqrt" % name)
                eps = cov_mat_sqrt.new_empty((cov_mat_sqrt.size(0), 1)).normal_()
                cov_sample = (
                    scale / ((self.max_num_models - 1) ** 0.5)
                ) * cov_mat_sqrt.t().matmul(eps).view_as(mean)

                if fullrank:
                    w = mean + scaled_diag_sample + cov_sample
                else:
                    w = mean + scaled_diag_sample

            else:
                w = mean + scaled_diag_sample

            module.__setattr__(name, w)

    def sample_fullrank(self, scale, cov, fullrank):
        scale_sqrt = scale ** 0.5

        mean_list = []
        sq_mean_list = []

        if cov:
            cov_mat_sqrt_list = []

        for (module, name) in self.params:
            mean = module.__getattr__("%s_mean" % name)
            sq_mean = module.__getattr__("%s_sq_mean" % name)

            if cov:
                cov_mat_sqrt = module.__getattr__("%s_cov_mat_sqrt" % name)
                cov_mat_sqrt_list.append(cov_mat_sqrt.cpu())

            mean_list.append(mean.cpu())
            sq_mean_list.append(sq_mean.cpu())

        mean = flatten(mean_list)
        sq_mean = flatten(sq_mean_list)

        # draw diagonal variance sample
        var = torch.clamp(sq_mean - mean ** 2, self.var_clamp)
        var_sample = var.sqrt() * torch.randn_like(var, requires_grad=False)


        # if covariance draw low rank sample
        if cov:
            cov_mat_sqrt = torch.cat(cov_mat_sqrt_list, dim=1)

            cov_sample = cov_mat_sqrt.t().matmul(
                cov_mat_sqrt.new_empty(
                    (cov_mat_sqrt.size(0),), requires_grad=False
                ).normal_()
            )
            cov_sample /= (self.max_num_models - 1) ** 0.5

            rand_sample = var_sample + cov_sample
        else:
            rand_sample = var_sample

        # update sample with mean and scale
        sample = mean + scale_sqrt * rand_sample
        sample = sample.unsqueeze(0)

        # unflatten new sample like the mean sample
        samples_list = unflatten_like(sample, mean_list)

        for (module, name), sample in zip(self.params, samples_list):
            module.__setattr__(name, sample.cuda())

    def collect_model(self, base_model):
        for (module, name), base_param in zip(self.params, base_model.parameters()):
            mean = module.__getattr__("%s_mean" % name)
            sq_mean = module.__getattr__("%s_sq_mean" % name)

            # first moment
            mean = mean * self.n_models.item() / (
                self.n_models.item() + 1.0
            ) + base_param.data / (self.n_models.item() + 1.0)

            # second moment
            sq_mean = sq_mean * self.n_models.item() / (
                self.n_models.item() + 1.0
            ) + base_param.data ** 2 / (self.n_models.item() + 1.0)

            # square root of covariance matrix
            if self.no_cov_mat is False:
                cov_mat_sqrt = module.__getattr__("%s_cov_mat_sqrt" % name)

                # block covariance matrices, store deviation from current mean
                dev = (base_param.data - mean).view(-1, 1)
                cov_mat_sqrt = torch.cat((cov_mat_sqrt, dev.view(-1, 1).t()), dim=0)

                # remove first column if we have stored too many models
                if (self.n_models.item() + 1) > self.max_num_models:
                    cov_mat_sqrt = cov_mat_sqrt[1:, :]
                module.__setattr__("%s_cov_mat_sqrt" % name, cov_mat_sqrt)

            module.__setattr__("%s_mean" % name, mean)
            module.__setattr__("%s_sq_mean" % name, sq_mean)
        self.n_models.add_(1)

    def load_state_dict(self, state_dict, strict=True):
        if not self.no_cov_mat:
            n_models = state_dict["n_models"].item()
            rank = min(n_models, self.max_num_models)
            for module, name in self.params:
                mean = module.__getattr__("%s_mean" % name)
                module.__setattr__(
                    "%s_cov_mat_sqrt" % name,
                    mean.new_empty((rank, mean.numel())).zero_(),
                )
        super(SWAG, self).load_state_dict(state_dict, strict)

    def export_numpy_params(self, export_cov_mat=False):
        mean_list = []
        sq_mean_list = []
        cov_mat_list = []

        for module, name in self.params:
            mean_list.append(module.__getattr__("%s_mean" % name).cpu().numpy().ravel())
            sq_mean_list.append(
                module.__getattr__("%s_sq_mean" % name).cpu().numpy().ravel()
            )
            if export_cov_mat:
                cov_mat_list.append(
                    module.__getattr__("%s_cov_mat_sqrt" % name).cpu().numpy().ravel()
                )
        mean = np.concatenate(mean_list)
        sq_mean = np.concatenate(sq_mean_list)
        var = torch.clamp(sq_mean - mean ** 2, self.var_clamp)

        if export_cov_mat:
            return mean, var, cov_mat_list
        else:
            return mean, var

    def import_numpy_weights(self, w):
        k = 0
        for module, name in self.params:
            mean = module.__getattr__("%s_mean" % name)
            s = np.prod(mean.shape)
            module.__setattr__(name, mean.new_tensor(w[k : k + s].reshape(mean.shape)))
            k += s

    def generate_mean_var_covar(self):
        mean_list = []
        var_list = []
        cov_mat_root_list = []
        for module, name in self.params:
            mean = module.__getattr__("%s_mean" % name)
            sq_mean = module.__getattr__("%s_sq_mean" % name)
            cov_mat_sqrt = module.__getattr__("%s_cov_mat_sqrt" % name)

            mean_list.append(mean)
            var_list.append(torch.clamp(sq_mean - mean ** 2.0, self.var_clamp))
            cov_mat_root_list.append(cov_mat_sqrt)
        return mean_list, var_list, cov_mat_root_list

    def compute_ll_for_block(self, vec, mean, var, cov_mat_root):
        vec = flatten(vec)
        mean = flatten(mean)
        var = flatten(var)

        cov_mat_lt = RootLazyTensor(cov_mat_root.t())
        var_lt = DiagLazyTensor(var + 1e-6)
        covar_lt = AddedDiagLazyTensor(var_lt, cov_mat_lt)
        qdist = MultivariateNormal(mean, covar_lt)

        with gpytorch.settings.num_trace_samples(
            1
        ) and gpytorch.settings.max_cg_iterations(25):
            return qdist.log_prob(vec)

    def block_logdet(self, var, cov_mat_root):
        var = flatten(var)

        cov_mat_lt = RootLazyTensor(cov_mat_root.t())
        var_lt = DiagLazyTensor(var + 1e-6)
        covar_lt = AddedDiagLazyTensor(var_lt, cov_mat_lt)

        return covar_lt.log_det()

    def block_logll(self, param_list, mean_list, var_list, cov_mat_root_list):
        full_logprob = 0
        for i, (param, mean, var, cov_mat_root) in enumerate(
            zip(param_list, mean_list, var_list, cov_mat_root_list)
        ):
            # print('Block: ', i)
            block_ll = self.compute_ll_for_block(param, mean, var, cov_mat_root)
            full_logprob += block_ll

        return full_logprob

    def full_logll(self, param_list, mean_list, var_list, cov_mat_root_list):
        cov_mat_root = torch.cat(cov_mat_root_list, dim=1)
        mean_vector = flatten(mean_list)
        var_vector = flatten(var_list)
        param_vector = flatten(param_list)
        return self.compute_ll_for_block(
            param_vector, mean_vector, var_vector, cov_mat_root
        )

    def compute_logdet(self, block=False):
        _, var_list, covar_mat_root_list = self.generate_mean_var_covar()

        if block:
            full_logdet = 0
            for (var, cov_mat_root) in zip(var_list, covar_mat_root_list):
                block_logdet = self.block_logdet(var, cov_mat_root)
                full_logdet += block_logdet
        else:
            var_vector = flatten(var_list)
            cov_mat_root = torch.cat(covar_mat_root_list, dim=1)
            full_logdet = self.block_logdet(var_vector, cov_mat_root)

        return full_logdet

    def diag_logll(self, param_list, mean_list, var_list):
        logprob = 0.0
        for param, mean, scale in zip(param_list, mean_list, var_list):
            # thing = Normal(mean, scale).log_prob(param)# .sum()
            # thing = -(mean - param)**2 / (2*scale)
            # print(torch.square(mean - param).sum())
            # print(mean.shape, scale.min())
            # print(logprob, thing.sum())
            logprob += (-(mean - param)**2 / (2*scale)).sum()
            # thing.sum()
            # del thing
        return logprob

    def compute_logprob(self, vec=None, mvc=None, block=False, diag=False):
        mean_list, var_list, covar_mat_root_list = mvc
        # mean_list, var_list, covar_mat_root_list = self.generate_mean_var_covar()

        # if vec is None:
        #     param_list = [getattr(param, name) for param, name in self.params]
        # else:
            # param_list = unflatten_like(vec, mean_list)
            # param_list = vec
        param_list = vec # mean_list

        if diag:
            return self.diag_logll(param_list, mean_list, var_list)
        elif block is True:
            return self.block_logll(
                param_list, mean_list, var_list, covar_mat_root_list
            )
        else:
            return self.full_logll(param_list, mean_list, var_list, covar_mat_root_list)
